# Supplementary material
Source: PubMed Central journal article supplement (PMC5042848)
Supplement: NIHMS806585-supplement-supp_figs_tables.pdf [file NIHMS806585-supplement-supp_figs_tables.pdf]

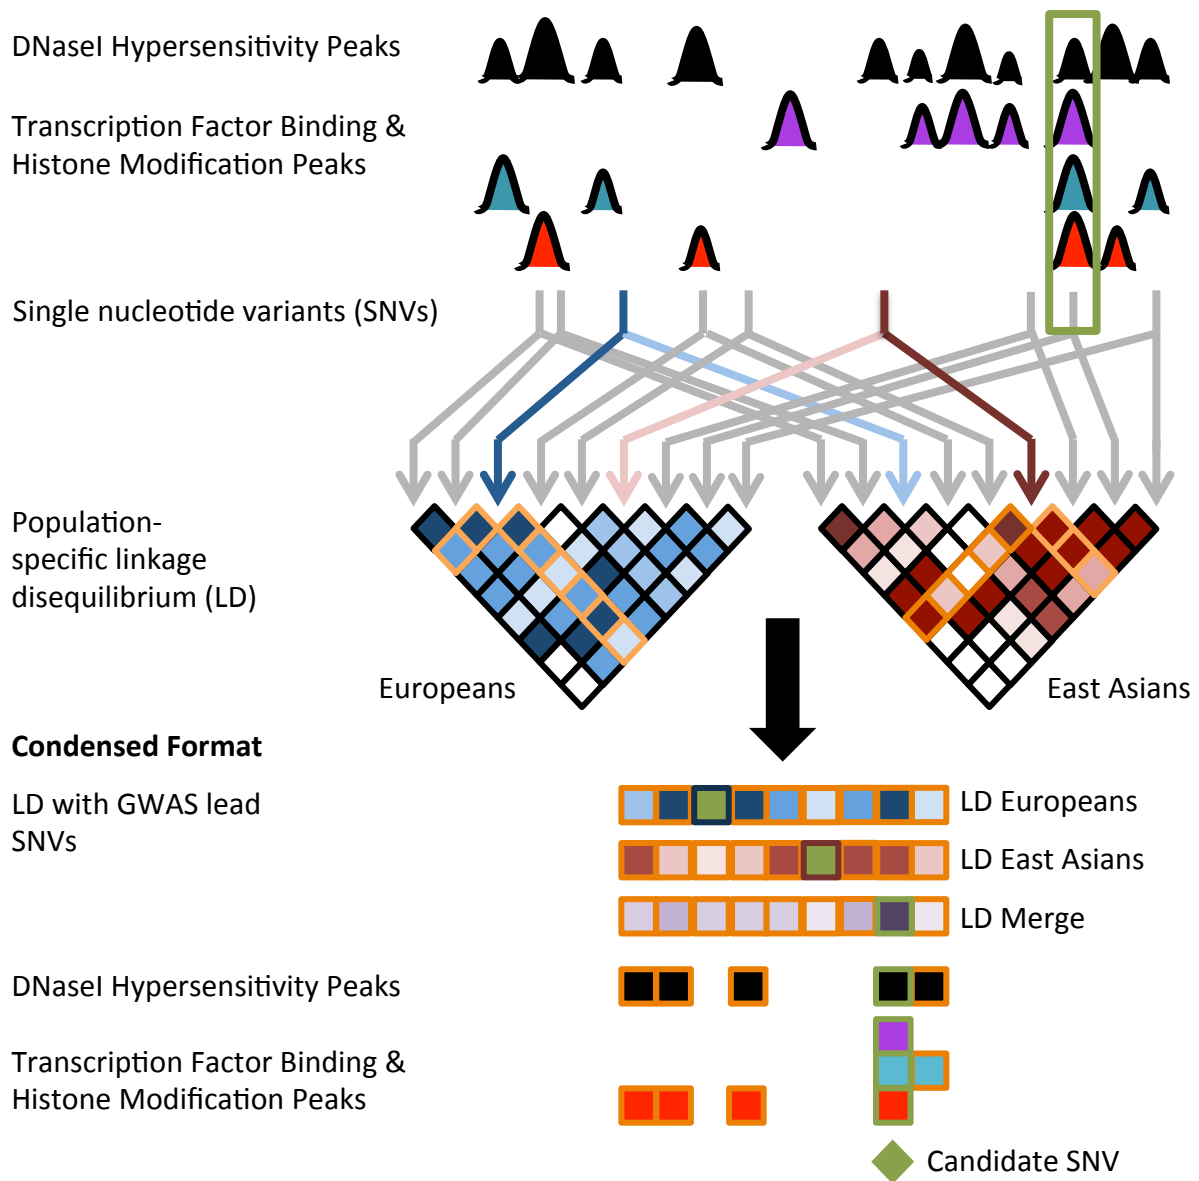

**Supplementary Figure 1:** Schematic representation of the population-specific LD merge and overlapping chromatin annotation data presented in Figure 1 and Supplementary Figure 2. The LD between the population-specific lead SNVs is calculated in the appropriate reference sample (blue = Europeans and red = East Asians) and merged (purple). The population-specific lead SNVs are filled in green in their respective plots. SNVs in strong LD with the lead SNVs in each separate population are outlined in green. The chromatin features overlapping each SNV in the region (top) are presented as boxes (bottom) below the LD merge.

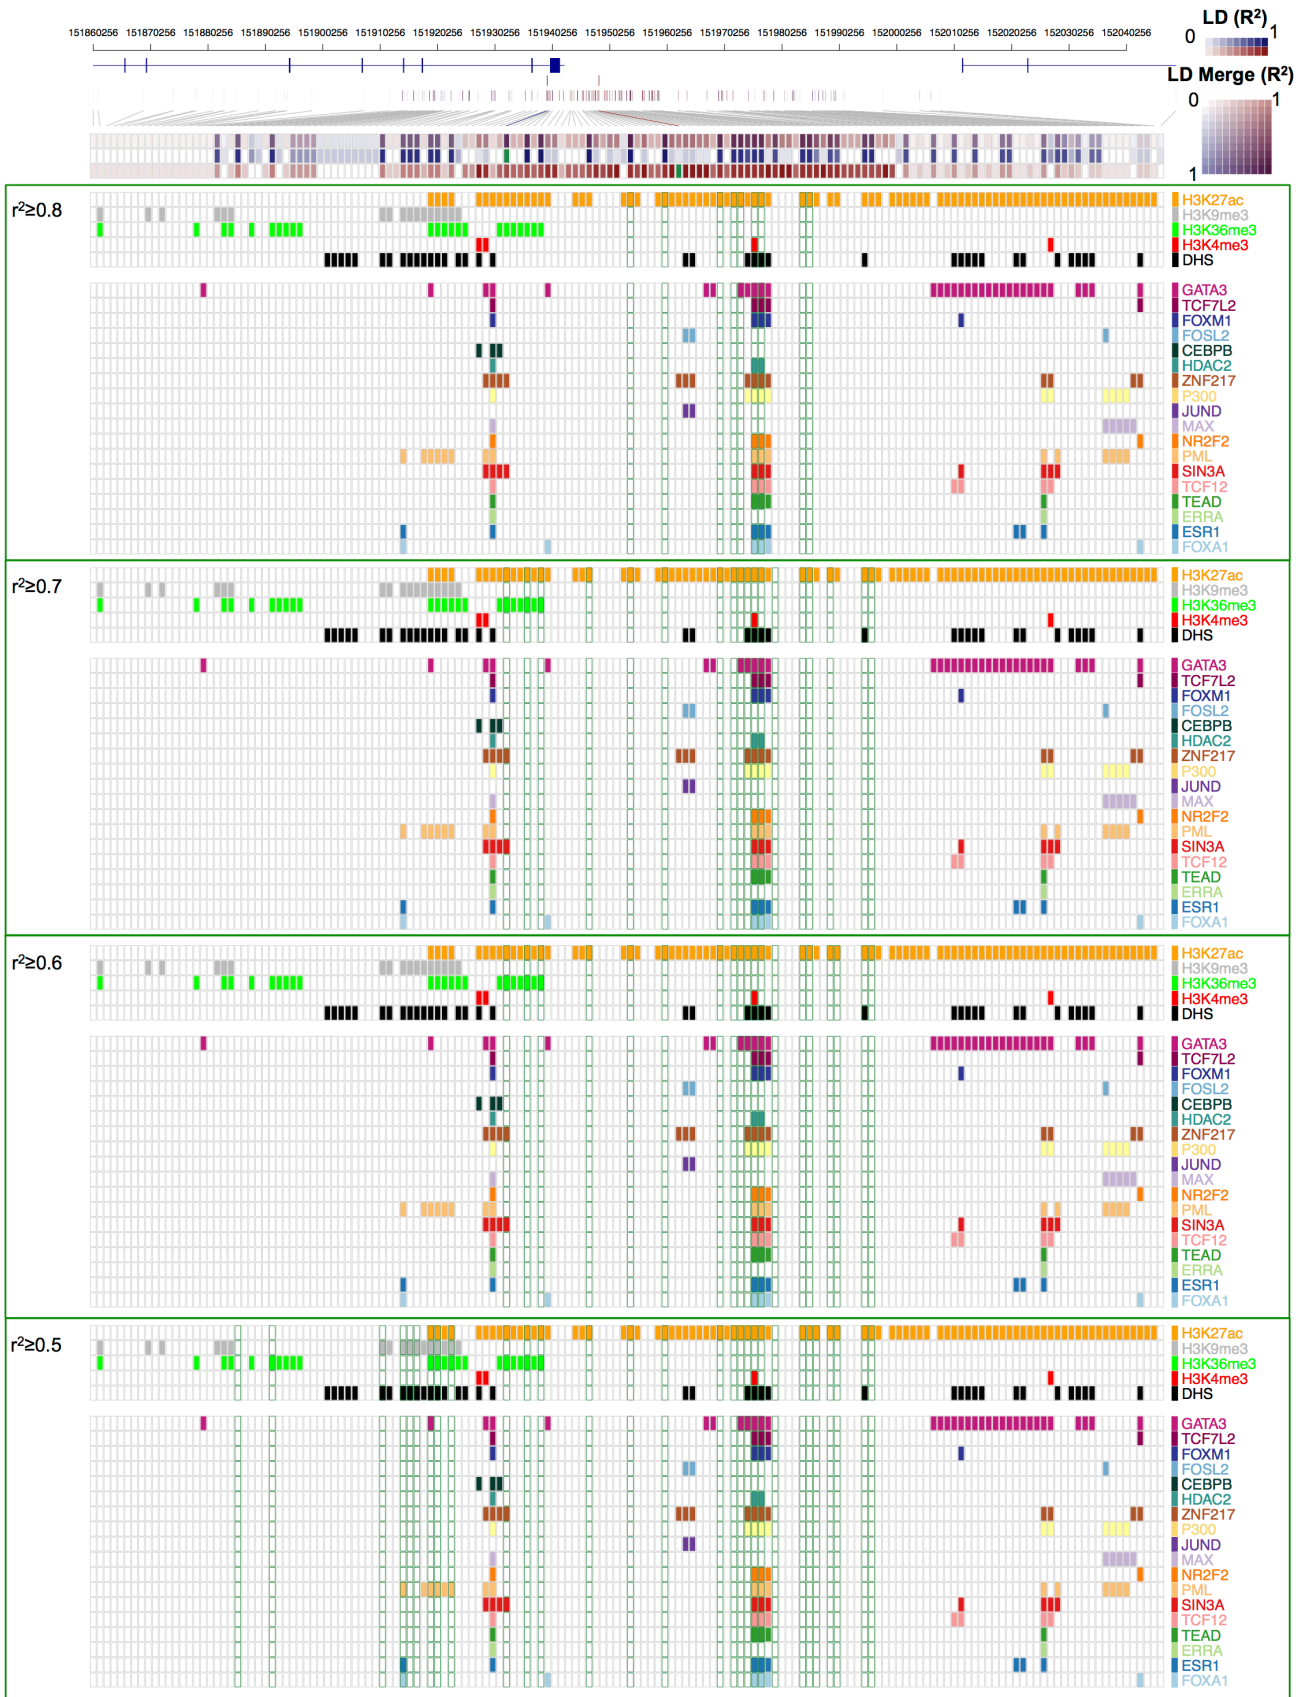

**Supplementary Figure 2:** The shared linkage disequilibrium (LD) between the European and East Asian lead SNVs. The combined strength of the LD (LD Merge) between nearby SNVs and the European and East Asian lead SNVs is shown (purple). The European LD (LD EUR) pattern for the rs3734805 SNVs (blue) and the East Asian LD (LD EAS) pattern for rs2046210 (red) are shown. The squares corresponding to the population-specific lead SNVs (rs3734805 and rs2046210) are filled in green. Each panel represents different LD thresholds ( $r^2 \geq 0.8, 0.7, 0.6$  and  $0.5$ , respectively). The SNVs passing the threshold in both the European and the East Asian populations are outlined in green boxes. The overlap of the SNVs with functional annotations (DHS, histones modifications and transcription factor binding) observed in breast cancer cells (MCF-7 or T-47D) profiled by the ENCODE project a represented as boxes and coloured according to the legend (right).

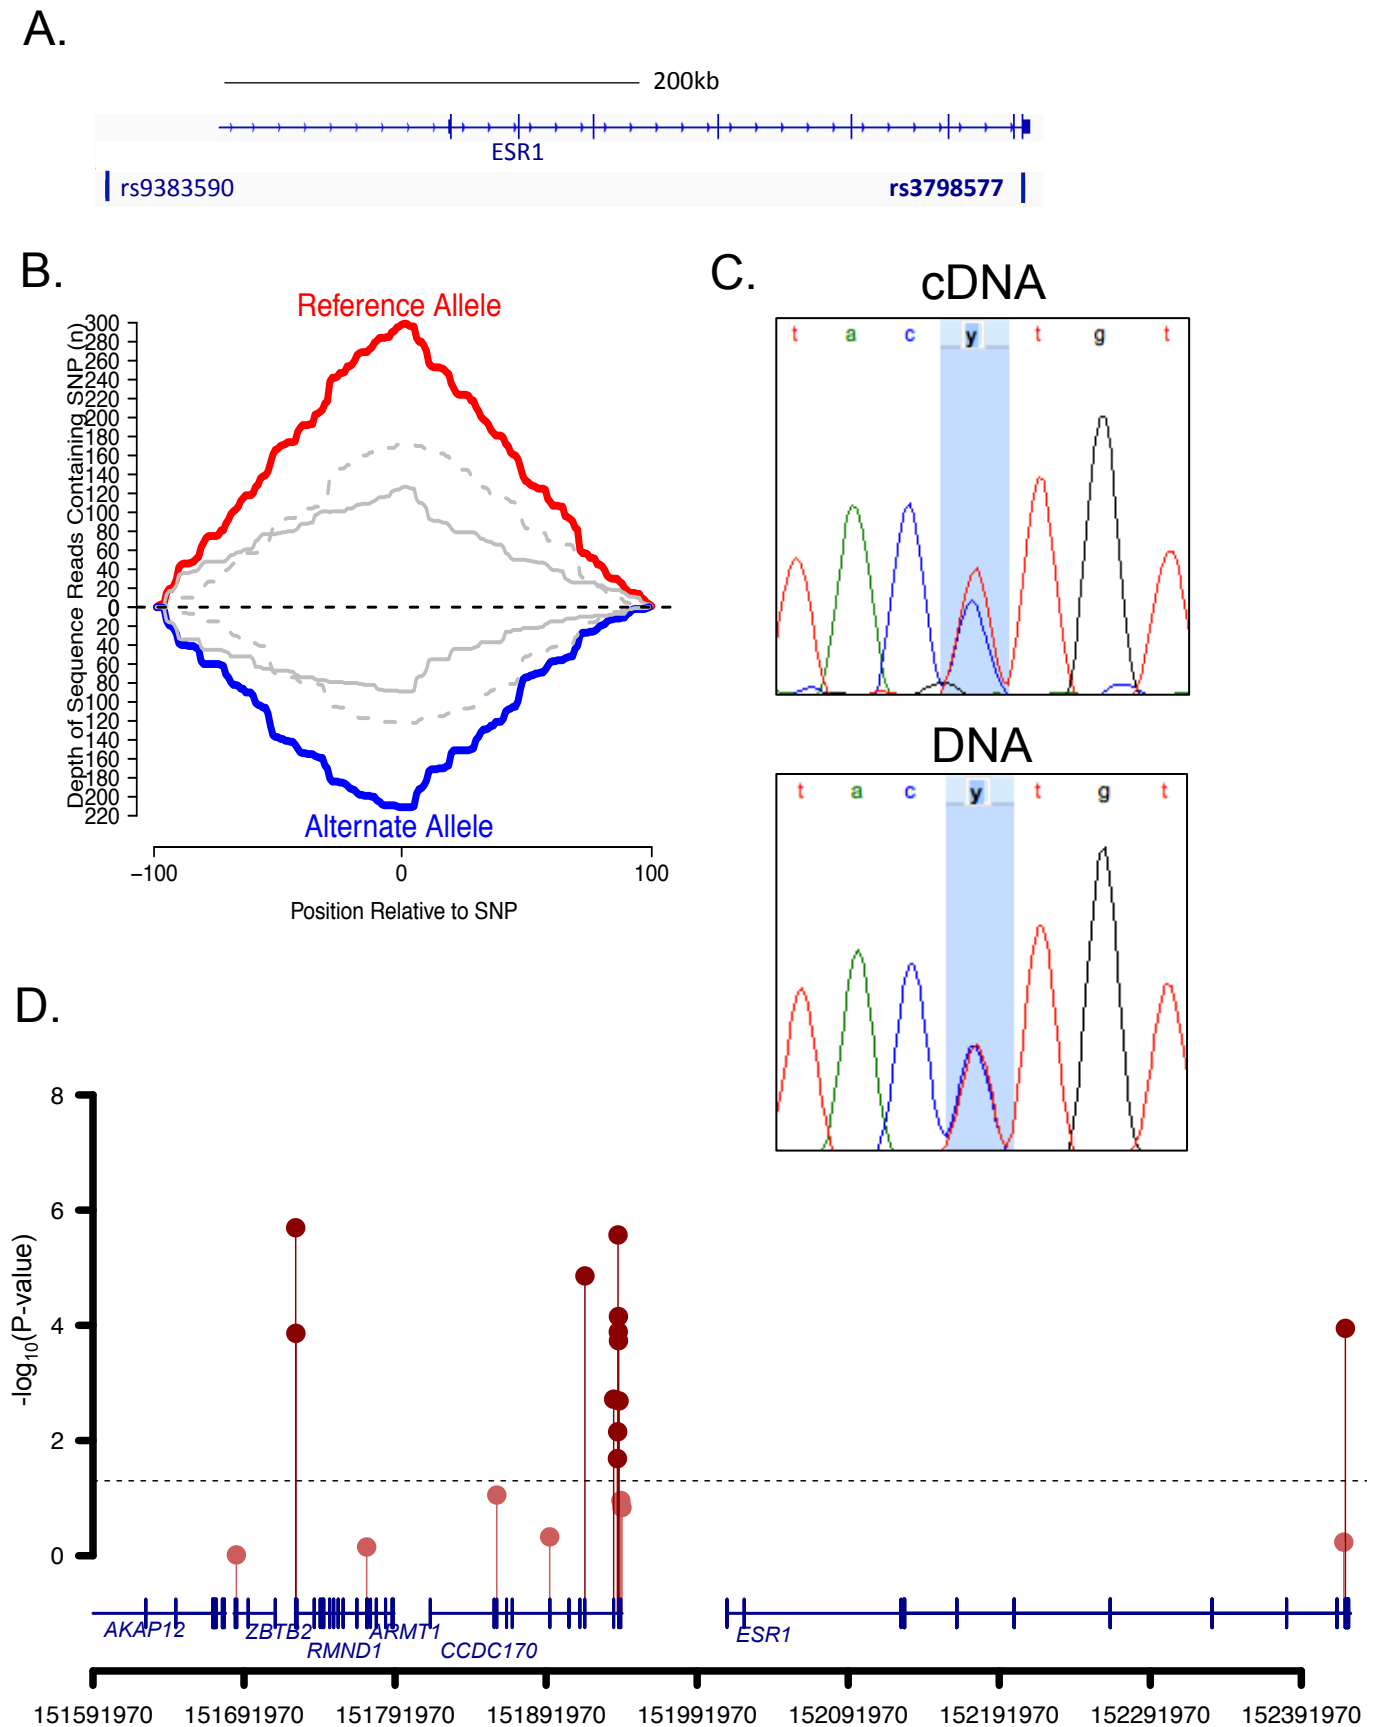

**Supplementary Figure 3:** Verification of the allele-biased expression of *ESR1* in HCC1419 cells. A) Location of the rs9383590 SNP and the marker rs3798577 SNP. B) Observed distribution of RNA-Seq reads containing each allele of the rs3798577 SNP. The pass both the strand distribution and the strand position tests. C) Sanger sequencing verification of allelic imbalance in *ESR1* expression in HCC1419 cells. D) Allelic imbalance of genes at the *ESR1* locus in the heterozygous HCC1419 cells. Heterozygous SNVs displaying a significant allelic imbalance (dark red) are shown together with their position relative to the genes (dark blue). Significance was determined using a binomial probability test. The dashed line indicates nominal significance ( $p < 0.05$ ).

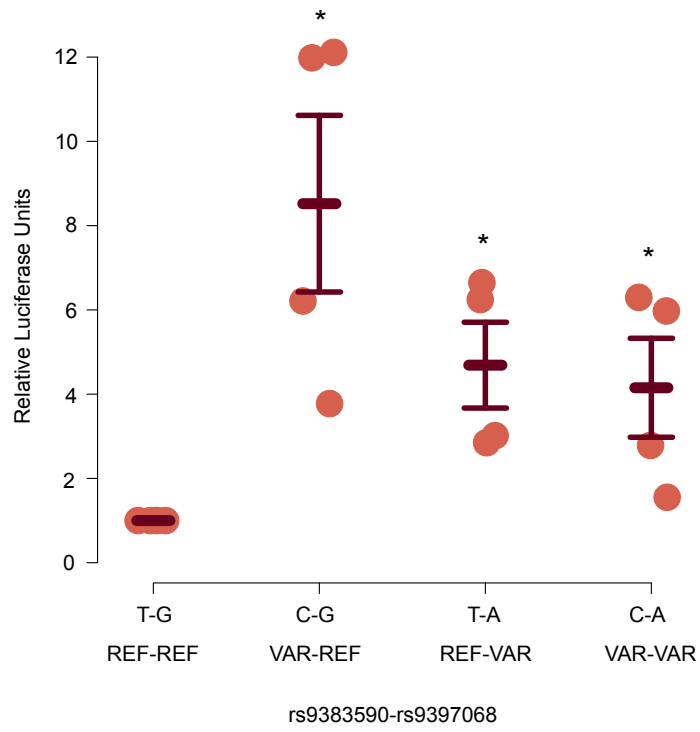

**Supplementary Figure 4:** Luciferase assays for the different rs9383590 and rs9397068 haplotypes. \* indicates  $p < 0.05$ .



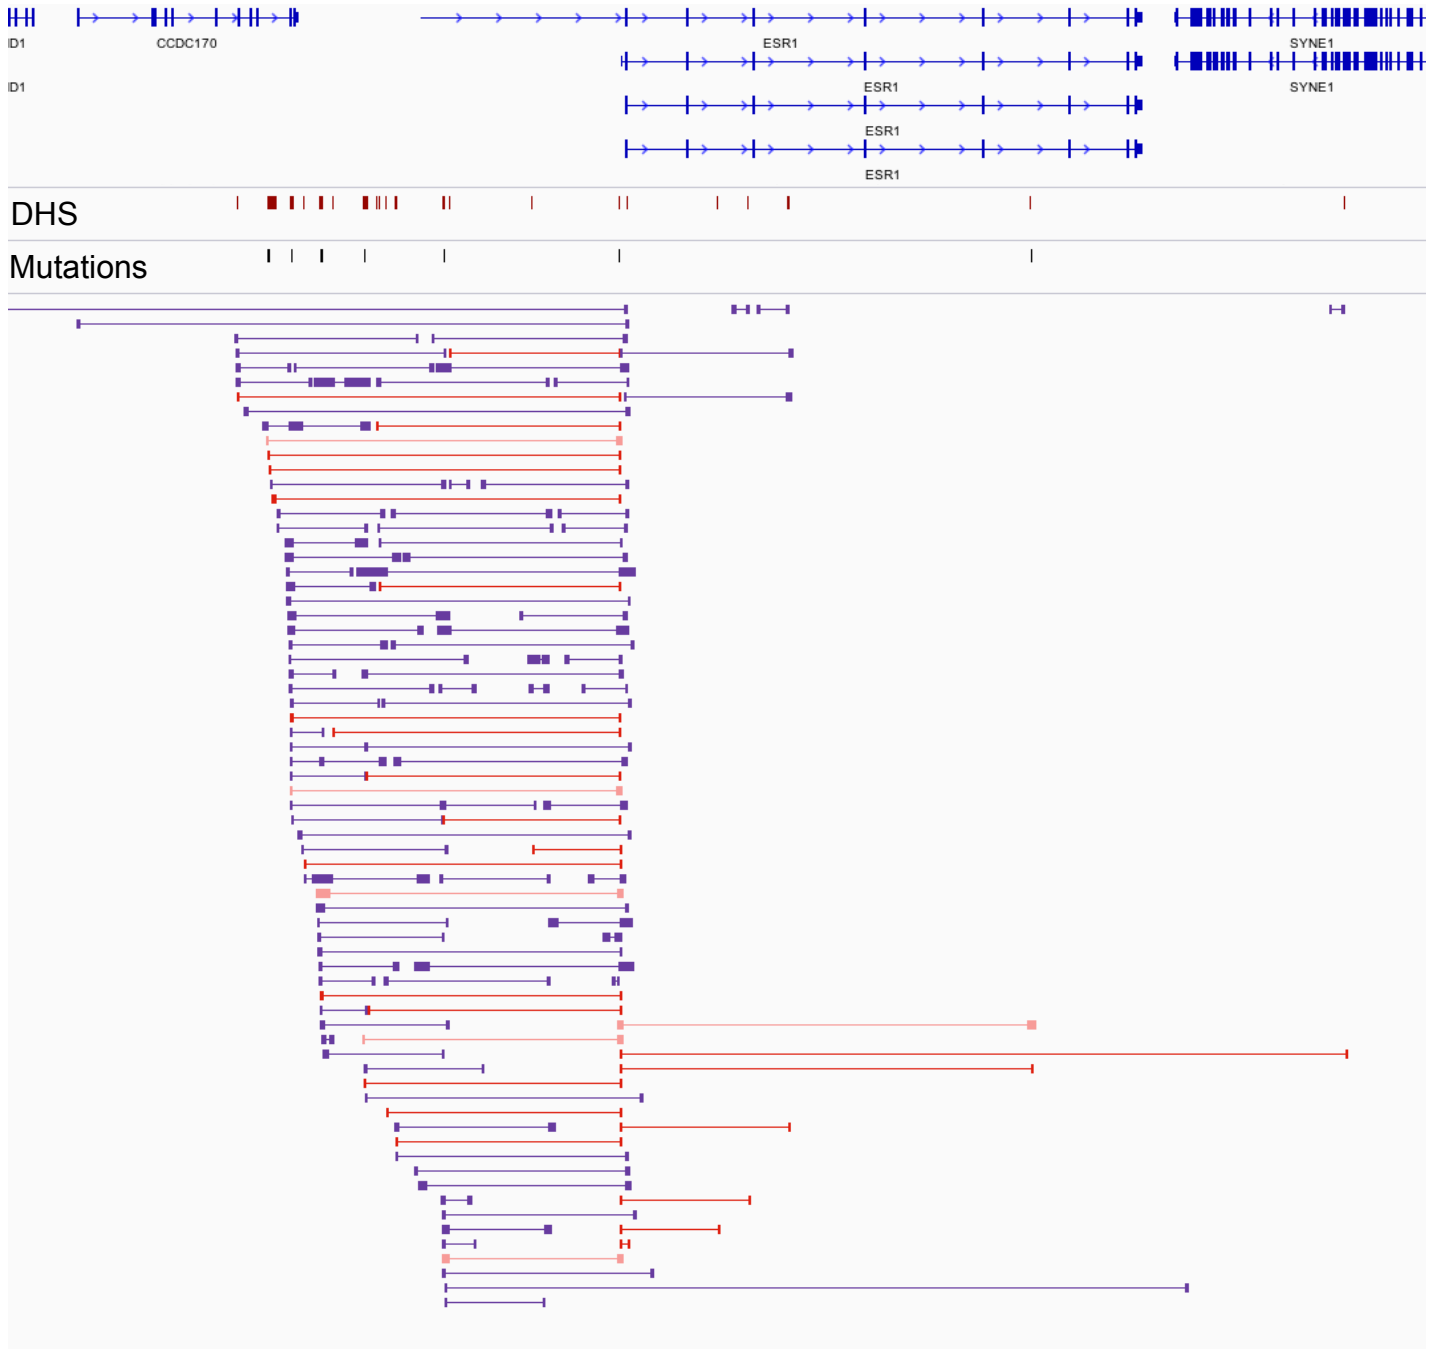

**Supplementary Figure 5:** Validation of the C3D predicted interactions at the *ESR1* locus. The C3D called interactions are shown in red. The ChIA-PET interactions are shown in purple. Only those interactions overlapping at least one end of the predicted interactions are shown. The 3C verified interactions are shown in pink.

A.

chr6:151923842:G>T (TNBC)

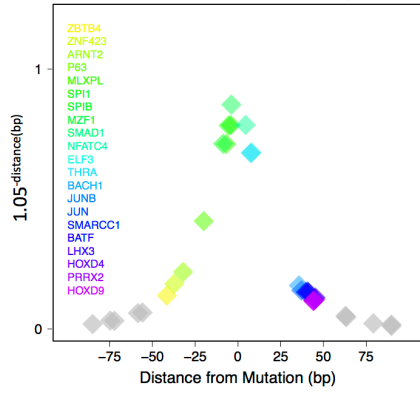

chr6:151937492:G>A (ESR1)

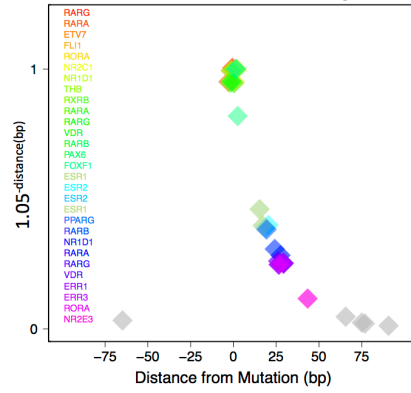

chr6:151937744:G>C (ESR1)

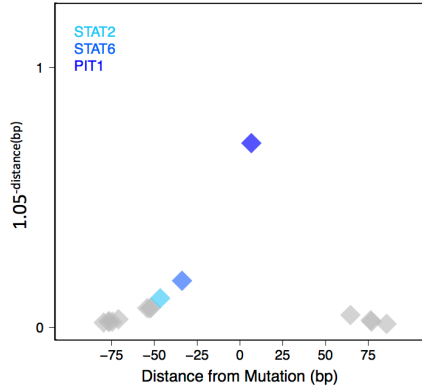

chr6:151954506:C>A (TNBC)

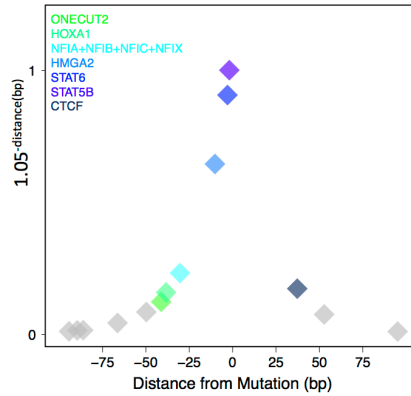

chr6:151979376:T>G (TNBC)

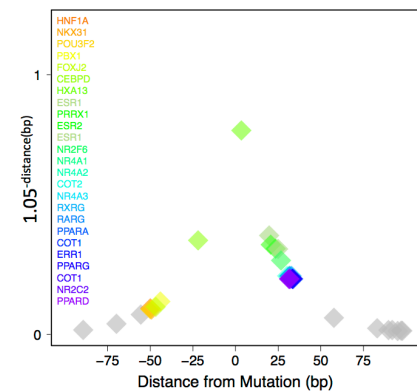

B.

chr6:151979547:A>G (ESR1+)

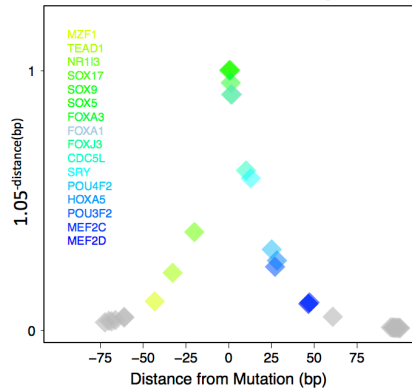

chr6:152075097:G>C (ESR1+)

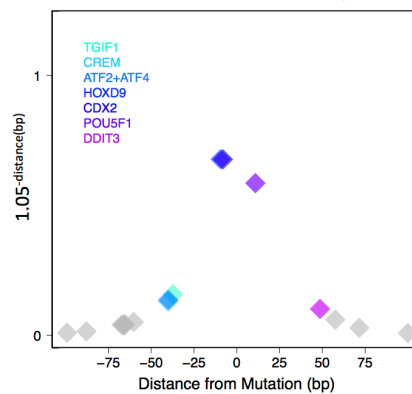

**Supplementary Figure 6:** The distance to the nearest transcription factor DNA recognition motifs of the mutations within the *ESR1* SRE excluded from Figure 4 for A) the mutations observed in the Alexandrov *et al.*<sup>27</sup> dataset and B) the mutations observed in the IMPACT/COMPACT samples. The y-axis is a function (1.05-distance) of the distance to the mutations to emphasize the closest motifs. Each diamond represents the location of a transcription factor motif.

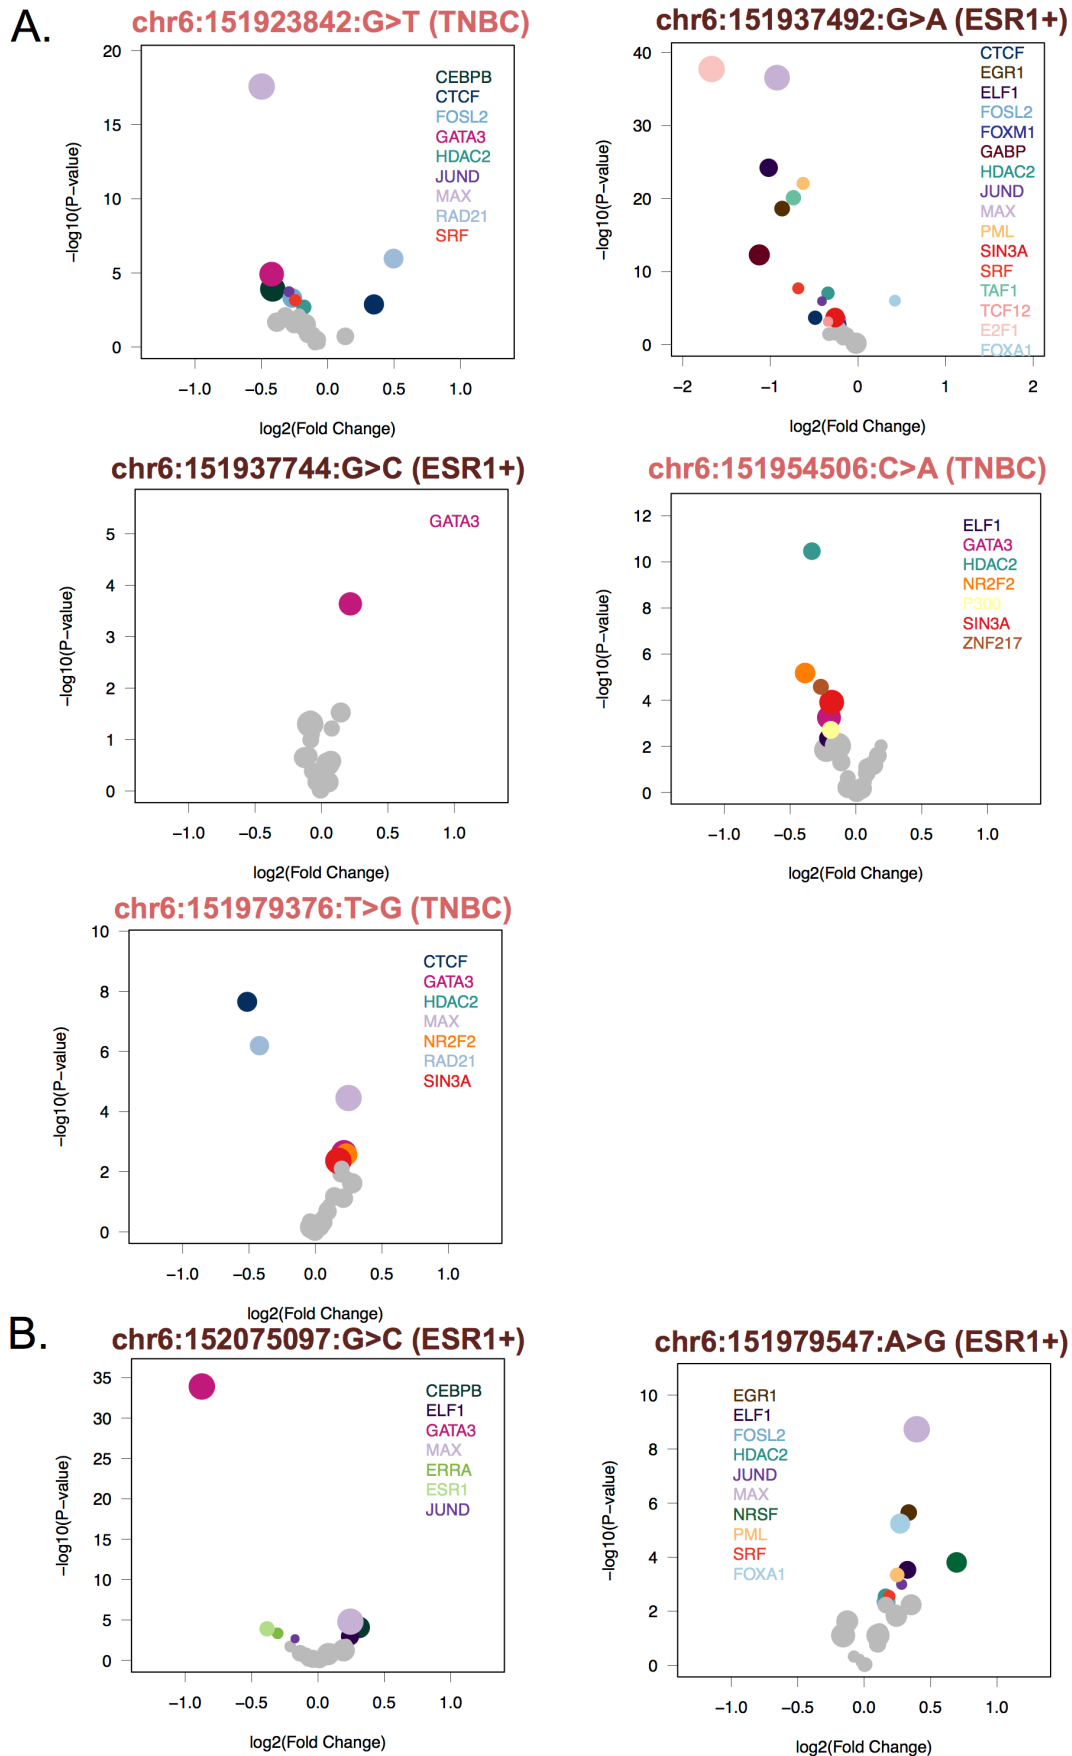

**Supplementary Figure 7:** Volcano plots of the IGR predicted modulation in chromatin binding intensity for transcription factors caused by the mutations in *ESR1*'s SRE excluded from Figure 4 for A) the mutations observed in the Alexandrov *et al.*<sup>27</sup> dataset and B) the mutations observed in the IMPACT/COMPACT samples.

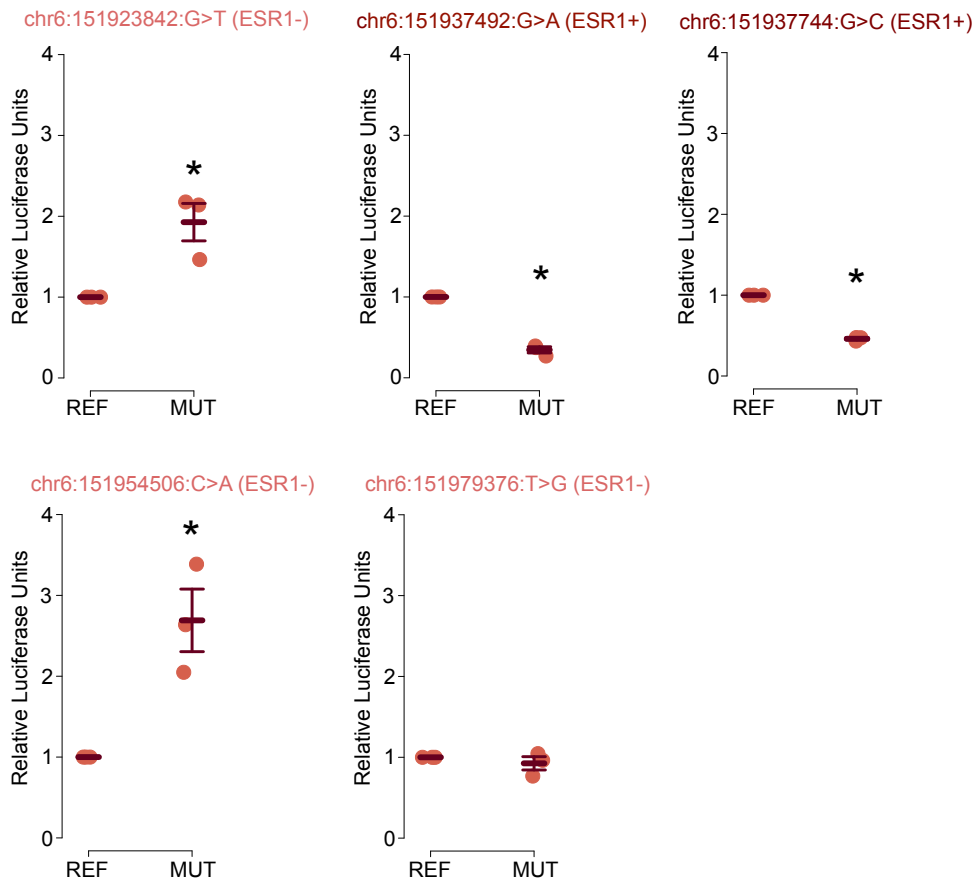

**Supplementary Figure 8:** Luciferase assays for the mutations in *ESR1*'s SRE excluded from Figure 4 observed in the Alexandrov *et al.*<sup>27</sup> dataset.

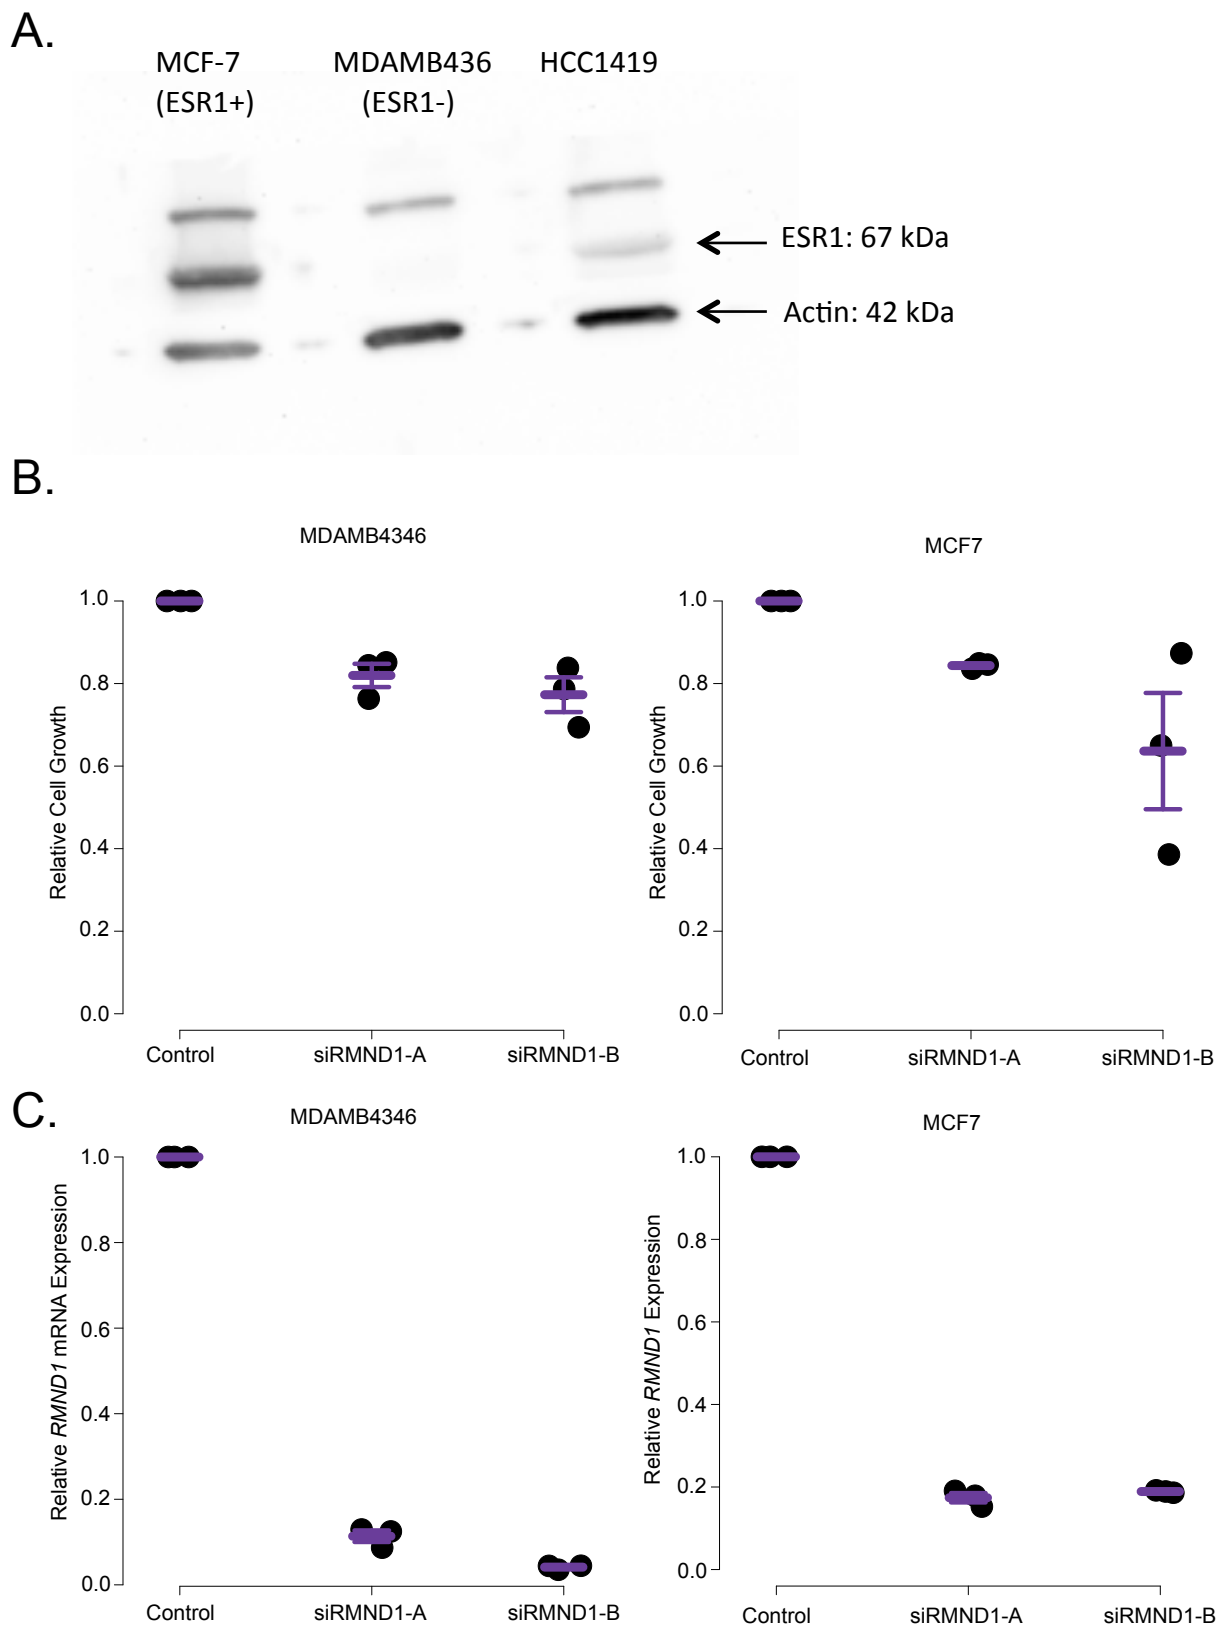

**Supplementary Figure 9:** A) Western blot verification of the ESR1 protein expression status of HCC1419 and MDAMB436. MCF-7 are used as positive control. B) Proliferation assays following silencing of *RMND1* in HCC1419 and MDAMB436 cells. C) Verification of the reduced expression of *RMND1* following silencing.

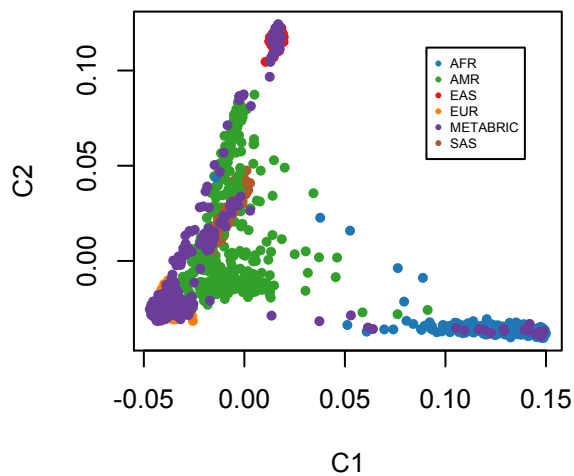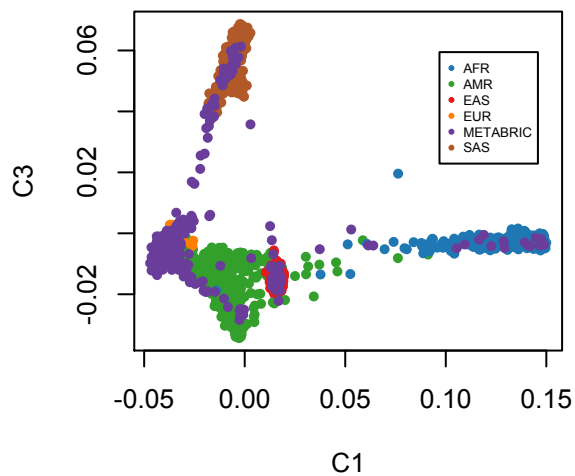

**EAS = East Asians**

( CHB=Han Chinese in Beijing China, JPT = Japanese in Toyko Japan, CHS = Southern Han Chinese, CDX = Chinese Dai in Xishuangbanna China, KHV = Kinh in Ho Chi Minh City, Vietnam)

**EUR = Europeans**

( CEU = Utah Residents (CEPH) with Northern and Western European Ancestry, TSI = Toscani in Italia, FIN = Finnish in Finland, GBR = British in England and Scotland, IBS = Iberian Population in Spain )

**AFR = Africans**

( YRI = Yoruba in Ibadan, Nigeria, LWK = Luhya in Webuye, Kenya , GWD = Gambian in Western Divisions in the Gambia, MSL= Mende in Sierra Leone, ESN = Esan in Nigeria, ASW = Americans of African Ancestry is SW USA, ACB = African Caribbeans in Barbados)

**AMR = Americans**

( MXL=Mexican Ancestry from Los Angeles USA, PUR=Puerto Ricans from Puerto Rico, CLM = Colombians from Medellin Colombia, PEL = Peruvians from Lima Peru);

**SAS = South Asians**

( GIH = Gujarati Indian from Houston Texas, PJI = Punjabi from Lashore, Pakistan, BEB =Bengali from Bengladesh, STU = Sri Lankan Tamil from the UK, ITU = Indian Tegulu from the UK).

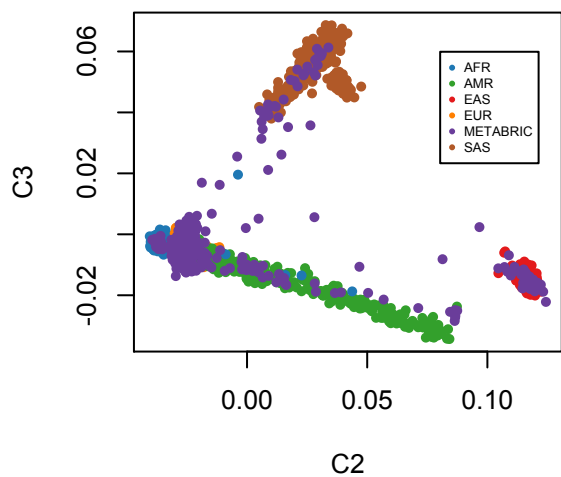

**Supplementary Figure 10:** Verification of the ethnicity of the METABRIC tumour samples through multidimensional scaling of the genotype data. The genotype data of the METABRIC samples was merged with the data generated by the 1,000 genomes project. The METABRIC samples (purple) are shown with respect to the diverse populations samples profiled by the 1,000 genomes project. The 1,000 genomes samples are coloured according to their continental groups. The first three components are shown.

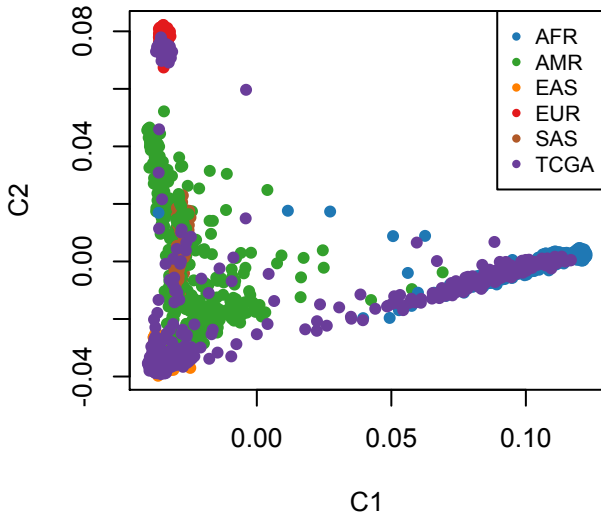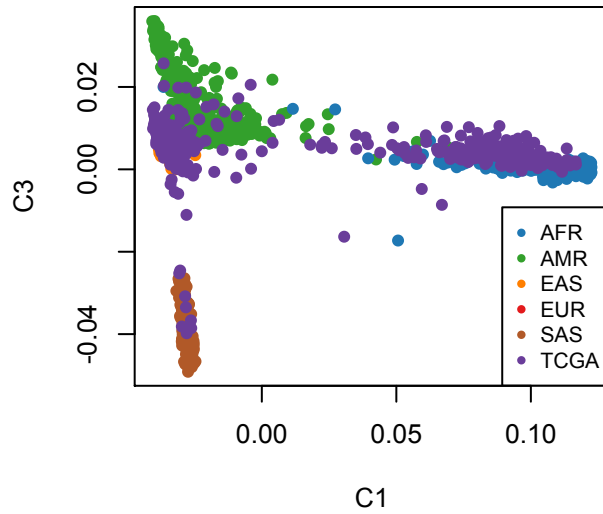

**EAS = East Asians**

( CHB=Han Chinese in Beijing China, JPT = Japanese in Toyko Japan, CHS = Southern Han Chinese, CDX = Chinese Dai in Xishuangbanna China, KHV = Kinh in Ho Chi Minh City, Vietnam)

**EUR = Europeans**

( CEU = Utah Residents (CEPH) with Northern and Western European Ancestry, TSI = Toscani in Italia, FIN = Finnish in Finland, GBR = British in England and Scotland, IBS = Iberian Population in Spain )

**AFR = Africans**

( YRI = Yoruba in Ibadan, Nigeria, LWK = Luhya in Webuye, Kenya , GWD = Gambian in Western Divisions in the Gambia, MSL= Mende in Sierra Leone, ESN = Esan in Nigeria, ASW = Americans of African Ancestry is SW USA, ACB = African Caribbeans in Barbados)

**AMR = Americans**

( MXL=Mexican Ancestry from Los Angeles USA, PUR=Puerto Ricans from Puerto Rico, CLM = Colombians from Medellin Colombia, PEL = Peruvians from Lima Peru);

**SAS = South Asians**

( GIH = Gujarati Indian from Houston Texas, PJI = Punjabi from Lashore, Pakistan, BEB =Bengali from Bengladesh, STU = Sri Lankan Tamil from the UK, ITU = Indian Tegulu from the UK).

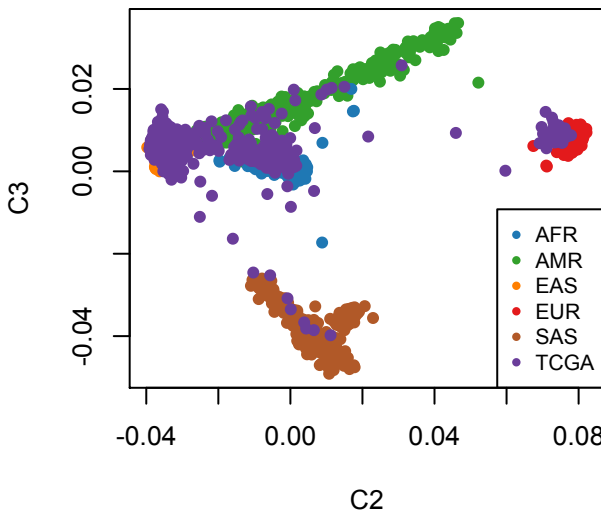

**Supplementary Figure 11:** Verification of the ethnicity of the TCGA tumour samples through multidimensional scaling of the genotype data. The genotype data of the TCGA samples was merged with the data generated by the 1,000 genomes project. The TCGA samples (purple) are shown with respect to the diverse populations samples profiled by the 1,000 genomes project. The 1,000 genomes samples are coloured according to their continental groups. The first three components are shown.

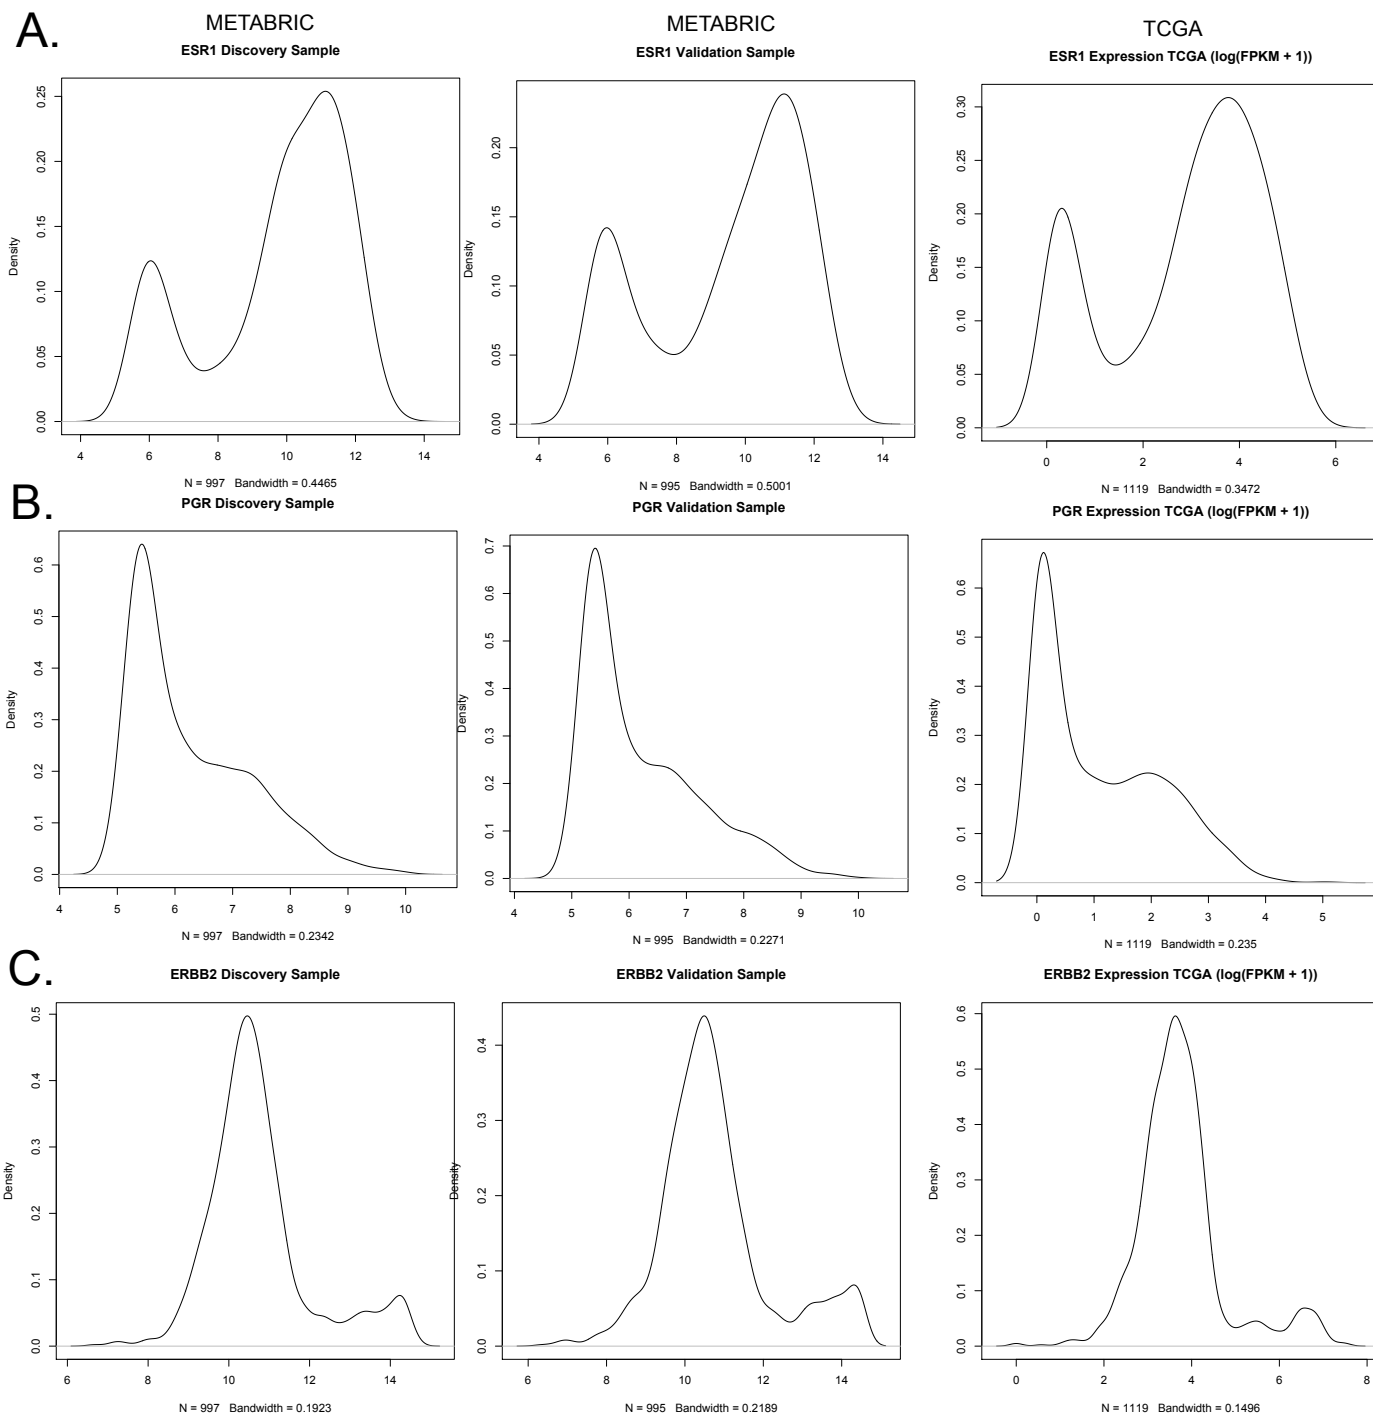

**Supplementary Figure 12:** The expression of the three breast cancer diagnostic genes (*ESR1*, *PGR*, *ERBB2*) among the METABRIC and TCGA samples. A) The expression of *ESR1* in the METABRIC discovery, METABRIC validation and TCGA samples, respectively. B) The expression of *PGR* in the METABRIC discovery, METABRIC validation and TCGA samples, respectively. The expression of *ERBB2* (HER2) in the METABRIC discovery, METABRIC validation and TCGA samples, respectively.



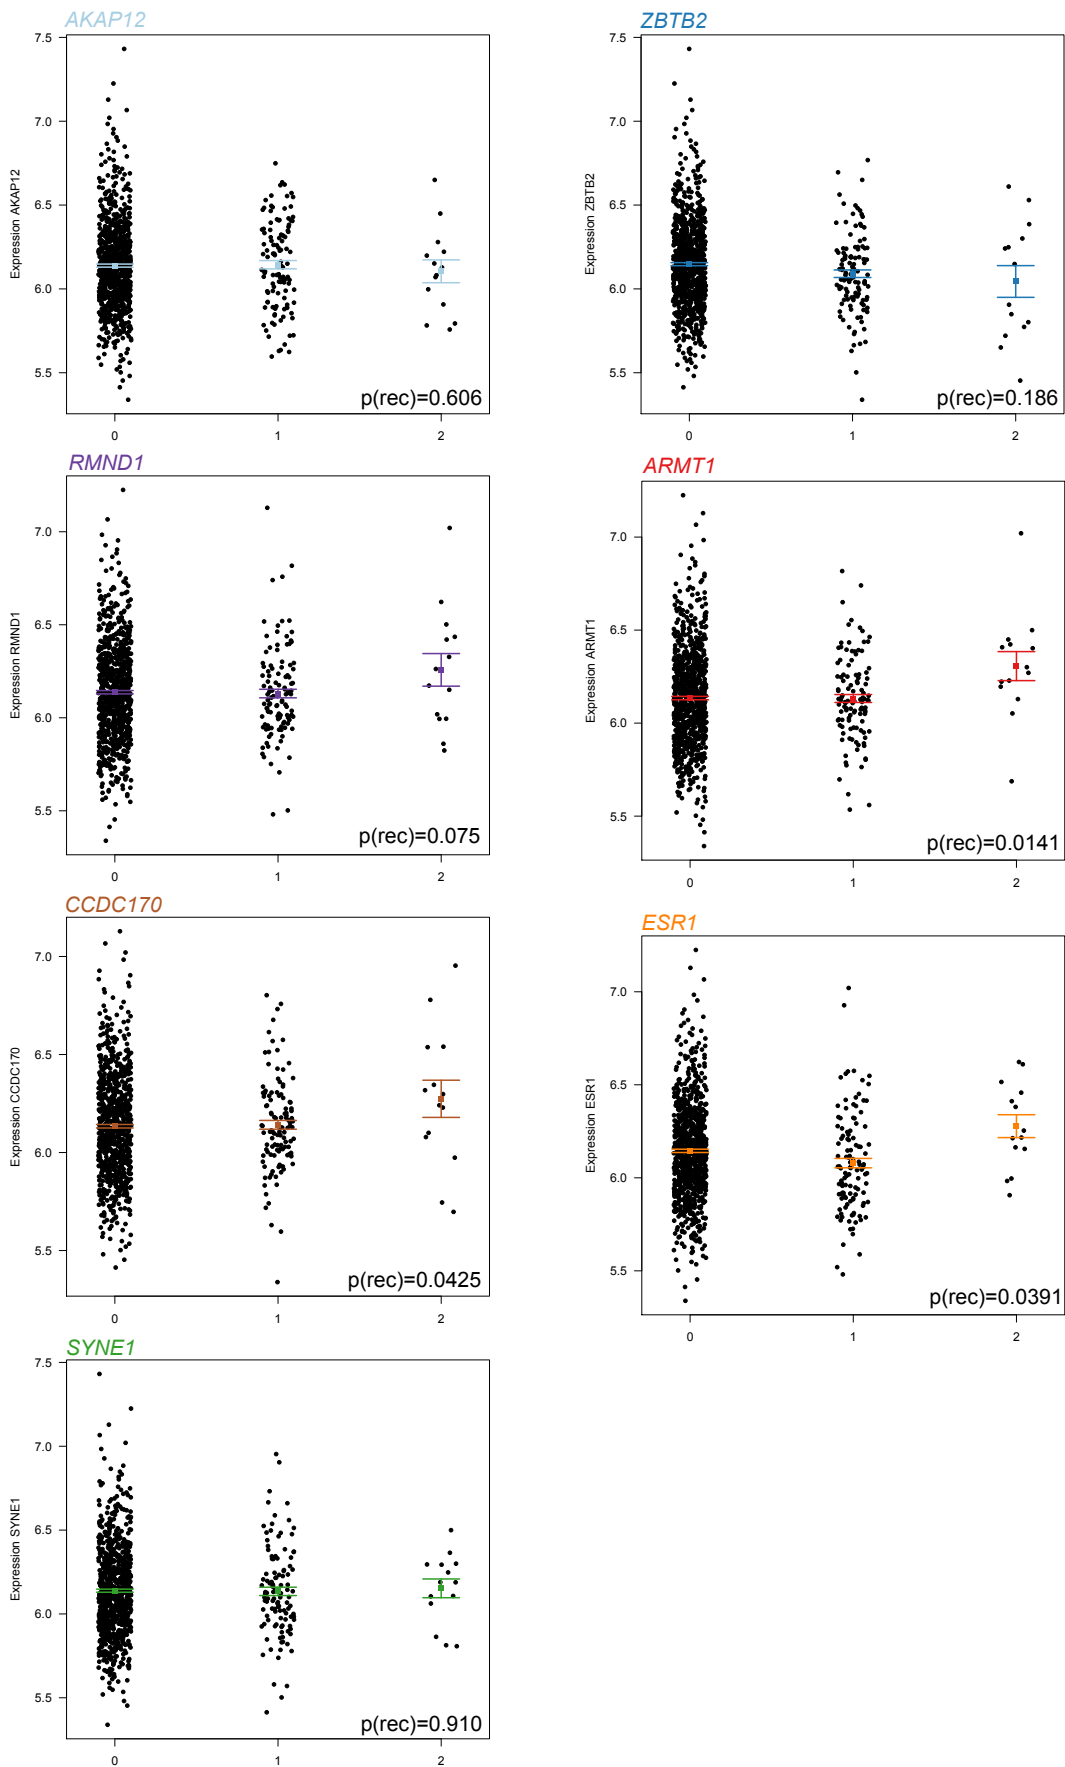

**Supplementary Figure 13:** Expression quantitative trait loci analysis of the genes at the *ESR1* locus among the METABRIC samples. The analysis is restricted to samples expressing both *ESR1* and *PGR*, but not overexpressing *ERBB2*. The expression value for each gene is plotted by the proxy SNV rs9397437 genotypes. The P-values were calculated using linear regression under a recessive model. The mean and standard error of the mean are shown. The reported p-values are two-sided.

A.

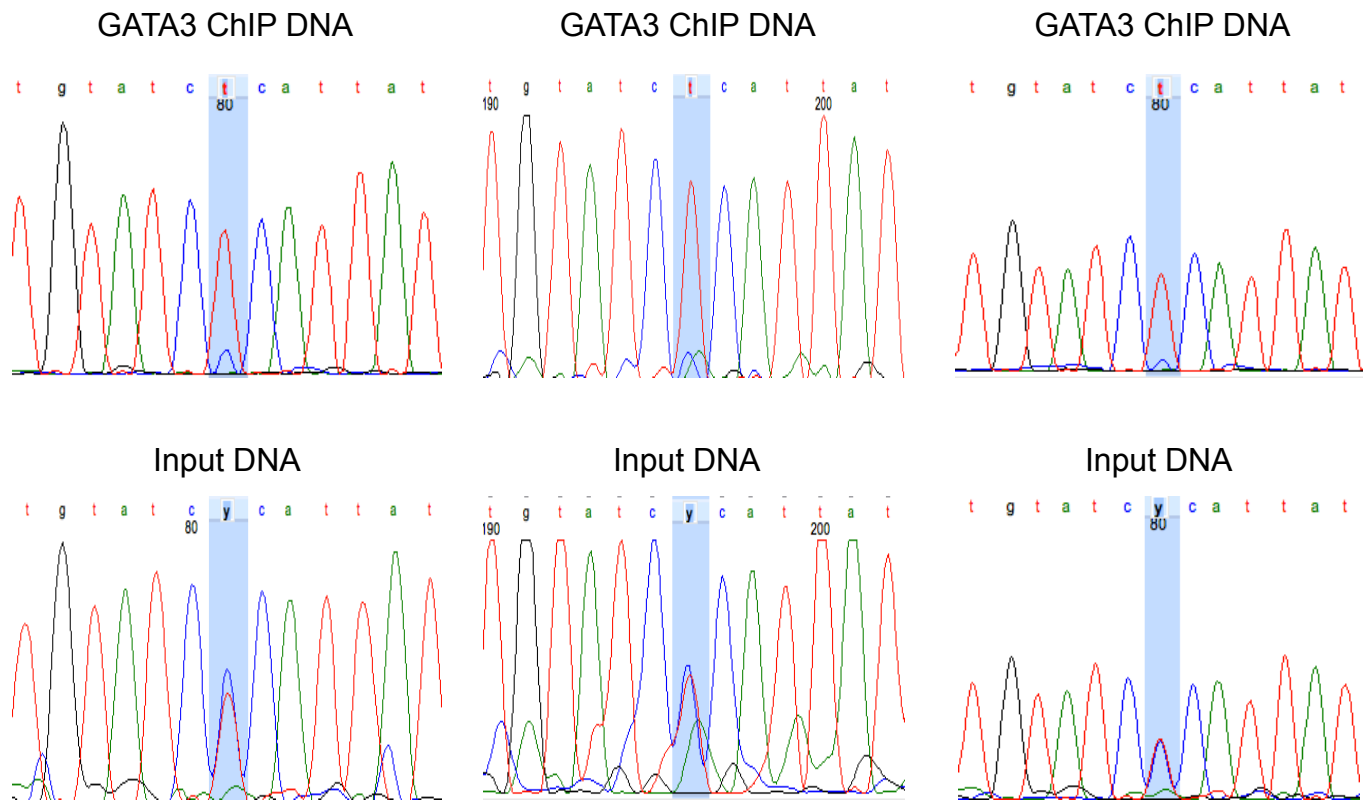

B.

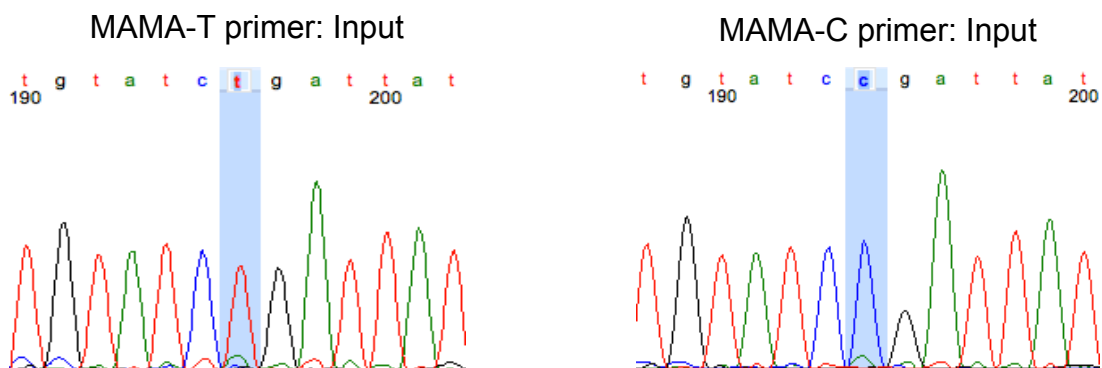

**Supplementary Figure 14:** A) Sanger sequencing validation of the allele-specific binding of GATA3 caused by the rs9383590 SNV in the heterozygous HCC1419 cells. Sequencing traces of the GATA3 ChIP DNA and input DNA are shown in triplicate. B) Sanger sequencing validation of the specificity of the MAMA primers used to assess the allele-specific binding of GATA3 in HCC1419 cells.

A)

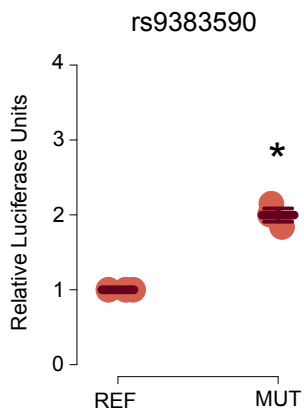

B)

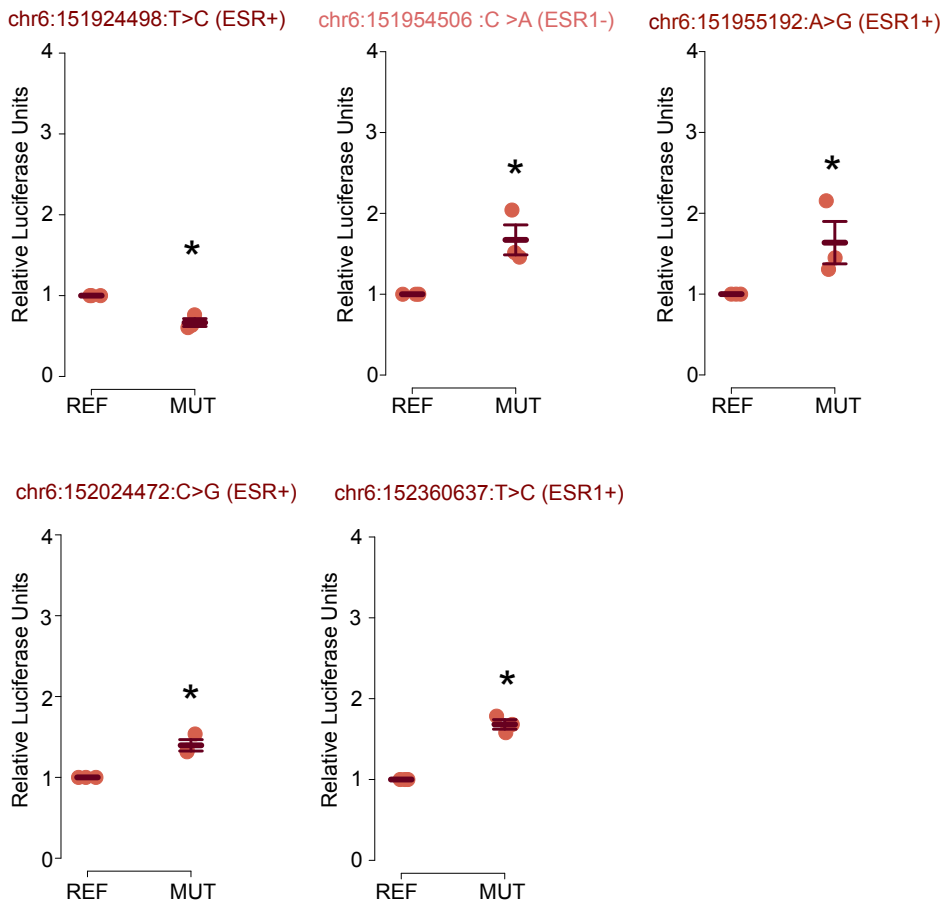

Supplementary Figure 15: Luciferase assays in the sense orientation for the A) rs9383590 and B) the subset of mutations affecting the most correlated enhancer elements.

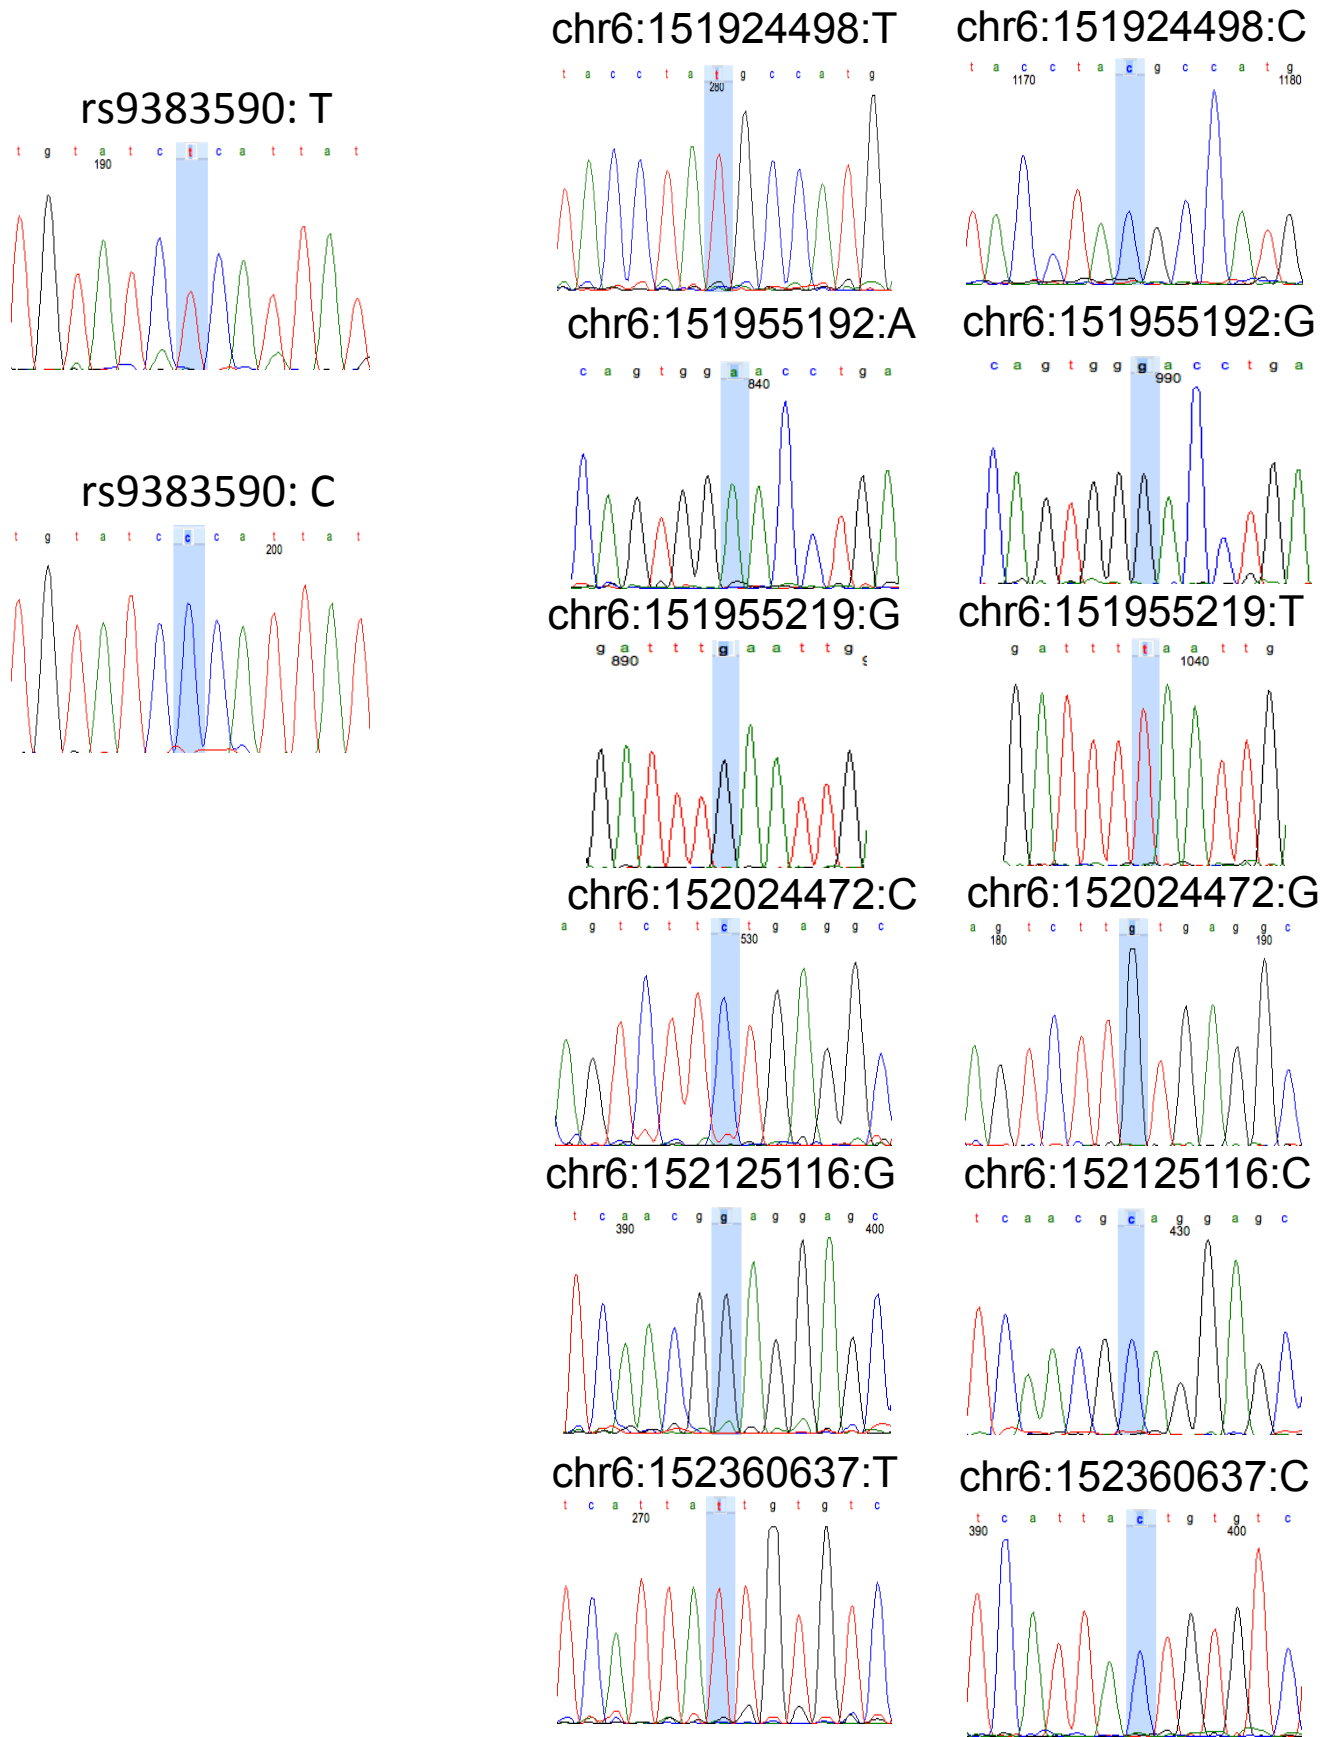

**Supplementary Figure 16:** Verification of the plasmid sequences used for the luciferase assays. Sequencing traces for each reference and variant allele are shown.

chr6:151923842:G

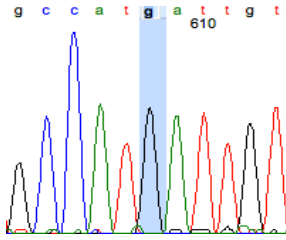

chr6:151923842:T

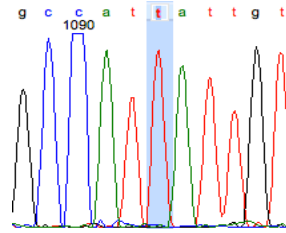

chr6:151937492:G

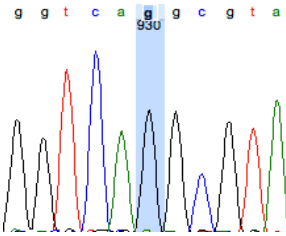

chr6:151937492:A

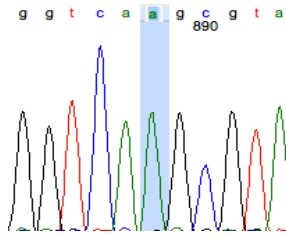

chr6:151937744:G

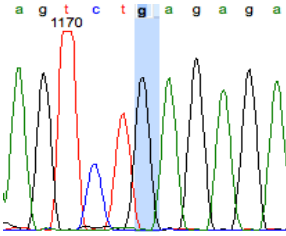

chr6:151937744:C

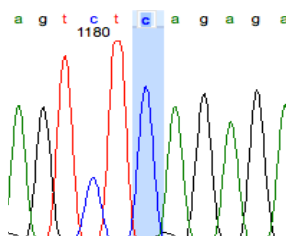

chr6:151954506:C

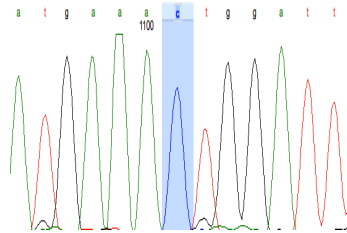

chr6:151954506:A

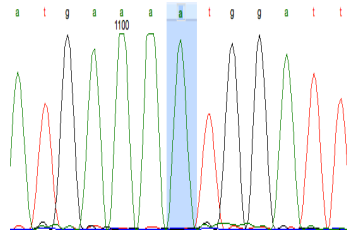

chr6:151979376:T

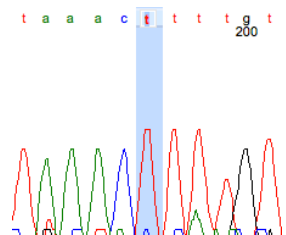

chr6:151979376:G

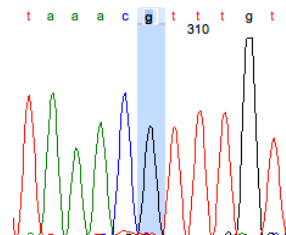

**Supplementary Figure 16 (Continued):** Verification of the plasmid sequences used for the luciferase assays. Sequencing traces for each reference and variant allele are shown.

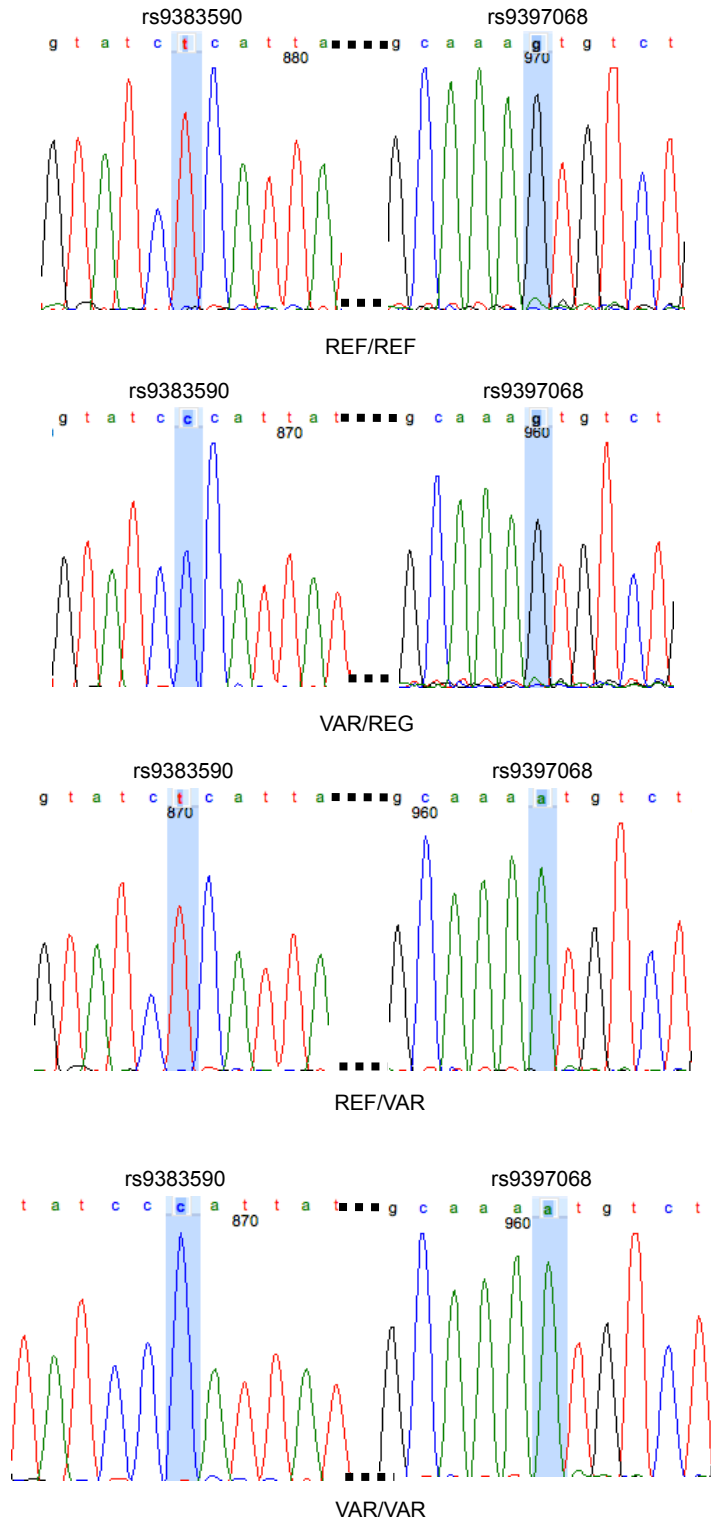

**Supplementary Figure 16 (Continued):** Verification of the plasmid sequences used for the luciferase assays. Sequencing traces for each reference and variant allele are shown.

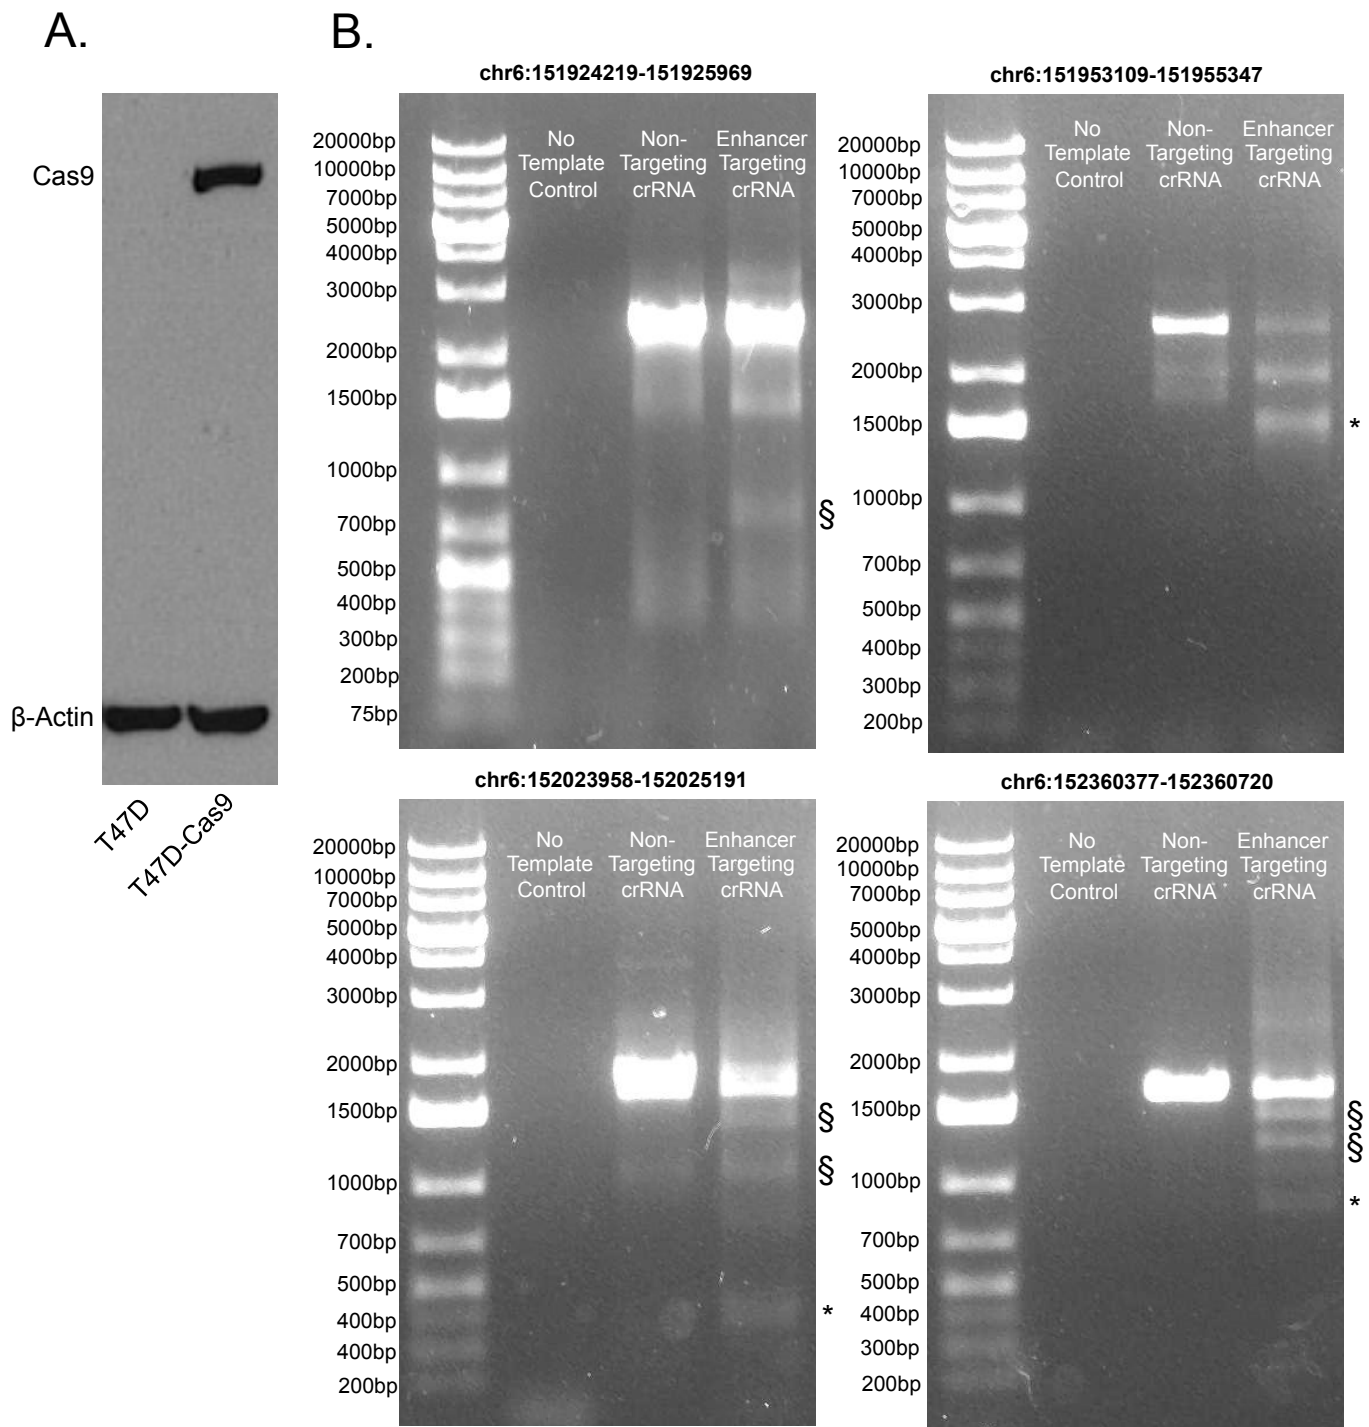

**Supplementary Figure 17:** A) Western blot verification of the T-47D cells stably expressing Cas9. B) Verification the CRISPR/Cas9-based deletions of the enhancers regulating *ESR1* in T-47D cells by gel electrophoresis. \* indicates the expected PCR product for the full deletion. § indicates a partial deletions arising from the pool of crRNAs.

Supplementary Table 1: The *ESR1* SRE target regions.

| CHROMOSOME | START     | STOP      | C3D (r) |
|------------|-----------|-----------|---------|
| chr6       | 151906320 | 151906705 | 0.729   |
| chr6       | 151923646 | 151923936 | 0.748   |
| chr6       | 151924219 | 151925969 | 0.903   |
| chr6       | 151926121 | 151929145 | 0.723   |
| chr6       | 151936846 | 151939138 | 0.776   |
| chr6       | 151943992 | 151944330 | 0.855   |
| chr6       | 151953109 | 151955347 | 0.960   |
| chr6       | 151960883 | 151961248 | 0.737   |
| chr6       | 151978585 | 151979706 | 0.895   |
| chr6       | 151979915 | 151980209 | 0.913   |
| chr6       | 151980470 | 151980818 | 0.725   |
| chr6       | 151986232 | 151986806 | 0.700   |
| chr6       | 151987596 | 151987862 | 0.919   |
| chr6       | 151991285 | 151991681 | 0.858   |
| chr6       | 151996467 | 151997821 | 0.857   |
| chr6       | 152023958 | 152025191 | 0.903   |
| chr6       | 152027481 | 152027946 | 0.964   |
| chr6       | 152074723 | 152075190 | 0.948   |
| chr6       | 152124717 | 152125407 | 1.000   |
| chr6       | 152129784 | 152130279 | 0.709   |
| chr6       | 152180749 | 152181134 | 0.844   |
| chr6       | 152198633 | 152198868 | 0.814   |
| chr6       | 152221688 | 152223084 | 0.805   |
| chr6       | 152360377 | 152360720 | 0.913   |



**Supplementary Table 2:** The mutational significance among the set of regulatory elements using the breast cancer predicted *ESR1* SRE based on various values for variable parameters, namely window around the *ESR1* promoter and correlation coefficient for C3D used in the MuSE analysis.

| Mutation Source | SRE Cancer - type | Window Size (+/-) | DCCC Threshold (r) | Number of Elements | Length of SRE (bp) | Number of Mutations | gBMR P-value                | IBMR P-value                |
|-----------------|-------------------|-------------------|--------------------|--------------------|--------------------|---------------------|-----------------------------|-----------------------------|
| BrCa            | BrCa              | 250kb             | 0.7                | 23                 | 20,744             | 10                  | <b>8.59x10<sup>-3</sup></b> | <b>7.63x10<sup>-3</sup></b> |
| BrCa            | BrCa              | 250kb             | 0.8                | 15                 | 12,971             | 7                   | <b>3.42x10<sup>-3</sup></b> | <b>5.79x10<sup>-3</sup></b> |
| BrCa            | BrCa              | 250kb             | 0.9                | 8                  | 7,746              | 6                   | <b>3.31x10<sup>-4</sup></b> | <b>3.15x10<sup>-3</sup></b> |
| BrCa            | BrCa              | 500kb             | 0.7                | 24                 | 21,044             | 10                  | <b>9.32x10<sup>-3</sup></b> | <b>8.06x10<sup>-3</sup></b> |
| BrCa            | BrCa              | 500kb             | 0.8                | 15                 | 12,971             | 7                   | <b>3.42x10<sup>-3</sup></b> | <b>3.50x10<sup>-3</sup></b> |
| BrCa            | BrCa              | 500kb             | 0.9                | 8                  | 7,746              | 6                   | <b>3.31x10<sup>-4</sup></b> | <b>2.57x10<sup>-4</sup></b> |
| ESR1+ BrCa      | BrCa              | 250kb             | 0.7                | 23                 | 20,744             | 7                   | <b>1.45x10<sup>-3</sup></b> | <b>2.18x10<sup>-3</sup></b> |
| ESR1+ BrCa      | BrCa              | 250kb             | 0.8                | 15                 | 12,971             | 5                   | <b>2.79x10<sup>-4</sup></b> | <b>6.88x10<sup>-4</sup></b> |
| ESR1+ BrCa      | BrCa              | 250kb             | 0.9                | 8                  | 7,746              | 5                   | <b>2.94x10<sup>-5</sup></b> | <b>6.46x10<sup>-5</sup></b> |
| ESR1+ BrCa      | BrCa              | 500kb             | 0.7                | 24                 | 21,044             | 7                   | <b>1.55x10<sup>-3</sup></b> | <b>3.03x10<sup>-3</sup></b> |
| ESR1+ BrCa      | BrCa              | 500kb             | 0.8                | 15                 | 12,971             | 5                   | <b>2.79x10<sup>-4</sup></b> | <b>7.02x10<sup>-4</sup></b> |
| ESR1+ BrCa      | BrCa              | 500kb             | 0.9                | 8                  | 7,746              | 5                   | <b>2.94x10<sup>-5</sup></b> | <b>7.02x10<sup>-5</sup></b> |
| TNBC BrCa       | BrCa              | 250kb             | 0.7                | 23                 | 20,744             | 3                   | <b>1.17x10<sup>-2</sup></b> | 0.052                       |
| TNBC BrCa       | BrCa              | 250kb             | 0.8                | 15                 | 12,971             | 2                   | 0.055                       | 0.265                       |
| TNBC BrCa       | BrCa              | 250kb             | 0.9                | 8                  | 7,746              | 1                   | 0.076                       | 0.154                       |
| TNBC BrCa       | BrCa              | 500kb             | 0.7                | 24                 | 21,044             | 3                   | <b>1.75x10<sup>-2</sup></b> | <b>3.96x10<sup>-2</sup></b> |
| TNBC BrCa       | BrCa              | 500kb             | 0.8                | 15                 | 12,971             | 2                   | 0.055                       | 0.159                       |
| TNBC BrCa       | BrCa              | 500kb             | 0.9                | 8                  | 7,746              | 1                   | 0.076                       | 0.111                       |
| LiHc            | BrCa              | 250kb             | 0.7                | 23                 | 20,744             | 5                   | 0.705                       | 0.692                       |
| LiHc            | BrCa              | 250kb             | 0.8                | 15                 | 12,971             | 4                   | 0.257                       | 0.311                       |
| LiHc            | BrCa              | 250kb             | 0.9                | 8                  | 7,746              | 3                   | 0.235                       | 0.280                       |
| LiHc            | BrCa              | 500kb             | 0.7                | 24                 | 21,044             | 5                   | 0.715                       | 0.790                       |
| LiHc            | BrCa              | 250kb             | 0.8                | 15                 | 12,971             | 4                   | 0.257                       | 0.323                       |
| LiHc            | BrCa              | 500kb             | 0.9                | 8                  | 7,746              | 3                   | 0.235                       | 0.235                       |

**Supplementary Table 3: IMPACT/COMPACT mutation information.**

| Centre | Build | Chrom | Start_Position | End_Position | Strand | Variant_Classification | Variant_Type | Reference_Allele | Tumour_Seq | dbSNP_RS | Tumor_Sample_ID | Matched_Normal_ID | Genome_Change           | Tumour_Fraction |
|--------|-------|-------|----------------|--------------|--------|------------------------|--------------|------------------|------------|----------|-----------------|-------------------|-------------------------|-----------------|
| PM     | hg19  | chr6  | 151955219      | 151955219    | +      | Non Coding             | SNV          | G                | T          | .        | RCT_15          | RCT_8             | g.chr6:151955219<br>G>T | 0.422           |
| PM     | hg19  | chr6  | 151979547      | 151979547    | +      | Non Coding             | SNV          | A                | G          | .        | RCT_41          | RCT_42            | g.chr6:151979547<br>A>G | 0.322           |
| PM     | hg19  | chr6  | 152075097      | 152075097    | +      | Non Coding             | SNV          | G                | C          | .        | RCT_51          | RCT_46            | g.chr6:152075097<br>G>C | 0.033           |

PM=Princess Margaret Cancer Centre

**Supplementary Table 4: SNVs in strong LD with the population-specific lead SNVs and their overlapping chromatin annotations.**

| SNP        | R2_with_rs2046210_East_Asians | R2_with_rs3734805_Europeans | H3K27ac | H3K9me3 | H3K36me3 | H3K4me3 | DHS | GATA3 | TCF7L2 | FOXM1 | FOSL2 | CEBPB | HDAC2 | ZNF217 | P300 | JUND | MAX | NR2F2 | PML | SIN3A | TCF12 | TEAD | ERRA | ESR1 | FOXA1 |   |
|------------|-------------------------------|-----------------------------|---------|---------|----------|---------|-----|-------|--------|-------|-------|-------|-------|--------|------|------|-----|-------|-----|-------|-------|------|------|------|-------|---|
| rs58893329 | 0.557405                      | 0.819071                    | 0       | 0       | 0        | 0       | 0   | 0     | 0      | 0     | 0     | 0     | 0     | 0      | 0    | 0    | 0   | 0     | 0   | 0     | 0     | 0    | 0    | 0    | 0     |   |
| rs12662670 | 0.563189                      | 0.819071                    | 0       | 0       | 1        | 0       | 0   | 0     | 0      | 0     | 0     | 0     | 0     | 0      | 0    | 0    | 0   | 0     | 0   | 0     | 0     | 0    | 0    | 0    | 0     | 0 |
| rs79475117 | 0.584369                      | 0.819071                    | 0       | 1       | 0        | 0       | 1   | 0     | 0      | 0     | 0     | 0     | 0     | 0      | 0    | 0    | 0   | 0     | 0   | 0     | 0     | 0    | 0    | 0    | 0     | 0 |
| rs1110776  | 0.580779                      | 0.819071                    | 0       | 1       | 0        | 0       | 1   | 0     | 0      | 0     | 0     | 0     | 0     | 0      | 0    | 0    | 0   | 0     | 1   | 0     | 0     | 0    | 0    | 1    | 1     |   |
| rs79416523 | 0.580779                      | 0.819071                    | 0       | 1       | 0        | 0       | 1   | 0     | 0      | 0     | 0     | 0     | 0     | 0      | 0    | 0    | 0   | 0     | 0   | 0     | 0     | 0    | 0    | 0    | 0     | 0 |
| rs17081488 | 0.584369                      | 0.819071                    | 0       | 1       | 0        | 0       | 1   | 0     | 0      | 0     | 0     | 0     | 0     | 0      | 0    | 0    | 0   | 0     | 0   | 0     | 0     | 0    | 0    | 0    | 0     | 0 |
| rs77334499 | 0.567719                      | 0.819071                    | 1       | 1       | 1        | 0       | 1   | 1     | 0      | 0     | 0     | 0     | 0     | 0      | 0    | 0    | 0   | 0     | 1   | 0     | 0     | 0    | 0    | 0    | 0     | 0 |
| rs12663501 | 0.567719                      | 0.819071                    | 1       | 1       | 1        | 0       | 1   | 0     | 0      | 0     | 0     | 0     | 0     | 0      | 0    | 0    | 0   | 0     | 1   | 0     | 0     | 0    | 0    | 0    | 0     | 0 |
| rs12663827 | 0.57097                       | 0.819071                    | 1       | 1       | 1        | 0       | 0   | 0     | 0      | 0     | 0     | 0     | 0     | 0      | 0    | 0    | 0   | 0     | 1   | 0     | 0     | 0    | 0    | 0    | 0     | 0 |
| rs3734805  | 0.772357                      | 1                           | 1       | 0       | 1        | 0       | 0   | 0     | 0      | 0     | 0     | 0     | 0     | 1      | 0    | 0    | 0   | 0     | 0   | 1     | 0     | 0    | 0    | 0    | 0     | 0 |
| rs9383935  | 0.776507                      | 1                           | 1       | 0       | 1        | 0       | 0   | 0     | 0      | 0     | 0     | 0     | 0     | 0      | 0    | 0    | 0   | 0     | 0   | 0     | 0     | 0    | 0    | 0    | 0     | 0 |
| rs9383589  | 0.77284                       | 1                           | 1       | 0       | 1        | 0       | 0   | 0     | 0      | 0     | 0     | 0     | 0     | 0      | 0    | 0    | 0   | 0     | 0   | 0     | 0     | 0    | 0    | 0    | 0     | 0 |
| rs9383936  | 0.788566                      | 0.986435                    | 1       | 0       | 0        | 0       | 0   | 0     | 0      | 0     | 0     | 0     | 0     | 0      | 0    | 0    | 0   | 0     | 0   | 0     | 0     | 0    | 0    | 0    | 0     | 0 |
| rs12665607 | 0.80445                       | 0.986435                    | 1       | 0       | 0        | 0       | 0   | 0     | 0      | 0     | 0     | 0     | 0     | 0      | 0    | 0    | 0   | 0     | 0   | 0     | 0     | 0    | 0    | 0    | 0     | 0 |
| rs74295874 | 0.80445                       | 0.986435                    | 1       | 0       | 0        | 0       | 0   | 0     | 0      | 0     | 0     | 0     | 0     | 0      | 0    | 0    | 0   | 0     | 0   | 0     | 0     | 0    | 0    | 0    | 0     | 0 |
| rs9397435  | 0.800747                      | 0.851507                    | 1       | 0       | 0        | 0       | 0   | 0     | 0      | 0     | 0     | 0     | 0     | 0      | 0    | 0    | 0   | 0     | 0   | 0     | 0     | 0    | 0    | 0    | 0     | 0 |
| rs9397436  | 0.800747                      | 0.864325                    | 1       | 0       | 0        | 0       | 0   | 0     | 0      | 0     | 0     | 0     | 0     | 0      | 0    | 0    | 0   | 0     | 0   | 0     | 0     | 0    | 0    | 0    | 0     | 0 |
| rs9397437  | 0.800747                      | 0.877499                    | 1       | 0       | 0        | 0       | 0   | 1     | 0      | 0     | 0     | 0     | 0     | 0      | 0    | 0    | 0   | 0     | 0   | 0     | 0     | 0    | 0    | 0    | 0     | 0 |
| rs58343273 | 0.800747                      | 0.792285                    | 1       | 0       | 0        | 0       | 1   | 1     | 0      | 0     | 0     | 0     | 0     | 1      | 1    | 0    | 0   | 0     | 0   | 0     | 0     | 0    | 0    | 0    | 0     | 0 |
| rs9383590  | 0.800747                      | 0.877499                    | 1       | 0       | 0        | 1       | 1   | 1     | 1      | 1     | 0     | 0     | 1     | 1      | 1    | 0    | 0   | 1     | 1   | 1     | 1     | 1    | 1    | 0    | 1     | 1 |
| rs9397068  | 0.800747                      | 0.877499                    | 1       | 0       | 0        | 0       | 1   | 1     | 1      | 1     | 0     | 0     | 1     | 1      | 1    | 0    | 0   | 1     | 1   | 1     | 1     | 1    | 1    | 0    | 1     | 1 |
| rs60954078 | 0.800747                      | 0.78133                     | 0       | 0       | 0        | 0       | 0   | 0     | 0      | 0     | 0     | 0     | 0     | 0      | 0    | 0    | 0   | 0     | 0   | 0     | 0     | 0    | 0    | 0    | 0     | 0 |
| rs9383937  | 0.800747                      | 0.877499                    | 1       | 0       | 0        | 0       | 0   | 0     | 0      | 0     | 0     | 0     | 0     | 0      | 0    | 0    | 0   | 0     | 0   | 0     | 0     | 0    | 0    | 0    | 0     | 0 |
| rs12173562 | 0.800747                      | 0.877499                    | 1       | 0       | 0        | 0       | 0   | 0     | 0      | 0     | 0     | 0     | 0     | 0      | 0    | 0    | 0   | 0     | 0   | 0     | 0     | 0    | 0    | 0    | 0     | 0 |
| rs12173570 | 0.876896                      | 0.594654                    | 1       | 0       | 0        | 0       | 0   | 0     | 0      | 0     | 0     | 0     | 0     | 0      | 0    | 0    | 0   | 0     | 0   | 0     | 0     | 0    | 0    | 0    | 0     | 0 |
| rs6912323  | 0.800747                      | 0.78133                     | 1       | 0       | 0        | 0       | 0   | 0     | 0      | 0     | 0     | 0     | 0     | 0      | 0    | 0    | 0   | 0     | 0   | 0     | 0     | 0    | 0    | 0    | 0     | 0 |
| rs17081533 | 0.876896                      | 0.601375                    | 1       | 0       | 0        | 0       | 0   | 0     | 0      | 0     | 0     | 0     | 0     | 0      | 0    | 0    | 0   | 0     | 0   | 0     | 0     | 0    | 0    | 0    | 0     | 0 |
| rs77275268 | 0.7407                        | 0.864325                    | 1       | 0       | 0        | 0       | 1   | 0     | 0      | 0     | 0     | 0     | 0     | 0      | 0    | 0    | 0   | 0     | 0   | 0     | 0     | 0    | 0    | 0    | 0     | 0 |
| rs9371545  | 0.7407                        | 0.864325                    | 1       | 0       | 0        | 0       | 0   | 0     | 0      | 0     | 0     | 0     | 0     | 0      | 0    | 0    | 0   | 0     | 0   | 0     | 0     | 0    | 0    | 0    | 0     | 0 |

1="yes"  
0="no"

**Supplementary Table 5:** Transcription Factor ChIP-Seq files used in the IGR analysis

| ChIP-Seq files used for the IGR analysis                   |
|------------------------------------------------------------|
| wgEncodeHaibTfbsMcf7Cebpbsc150V0422111AlnRep1.bam          |
| wgEncodeHaibTfbsMcf7CtfcV0422111AlnRep1.bam                |
| wgEncodeHaibTfbsMcf7Egr1V0422111AlnRep1.bam                |
| wgEncodeHaibTfbsMcf7Elf1V0422111AlnRep1.bam                |
| wgEncodeHaibTfbsMcf7Fosl2V0422111AlnRep1.bam               |
| wgEncodeHaibTfbsMcf7Foxm1sc502V0422111AlnRep1.bam          |
| wgEncodeHaibTfbsMcf7GabpV0422111AlnRep1.bam                |
| wgEncodeHaibTfbsMcf7Gata3V0422111AlnRep1.bam               |
| wgEncodeHaibTfbsMcf7Hdac2sc6296V0422111AlnRep1.bam         |
| wgEncodeHaibTfbsMcf7JundV0422111AlnRep1.bam                |
| wgEncodeHaibTfbsMcf7MaxV0422111AlnRep1.bam                 |
| wgEncodeHaibTfbsMcf7Nr2f2sc271940V0422111AlnRep1.bam       |
| wgEncodeHaibTfbsMcf7NrsfV0422111AlnRep1.bam                |
| wgEncodeHaibTfbsMcf7P300V0422111AlnRep1.bam                |
| wgEncodeHaibTfbsMcf7Pmlsc71910V0422111AlnRep1.bam          |
| wgEncodeHaibTfbsMcf7Rad21V0422111AlnRep1.bam               |
| wgEncodeHaibTfbsMcf7Sin3ak20V0422111AlnRep1.bam            |
| wgEncodeHaibTfbsMcf7SrfV0422111AlnRep1.bam                 |
| wgEncodeHaibTfbsMcf7Taf1V0422111AlnRep1.bam                |
| wgEncodeHaibTfbsMcf7Tcf12V0422111AlnRep1.bam               |
| wgEncodeHaibTfbsMcf7Tead4sc101184V0422111AlnRep1.bam       |
| wgEncodeSydhTfbsMcf7Hae2f1UcdAlnRep1.bam                   |
| wgEncodeSydhTfbsMcf7Tcf7I2UcdAlnRep1.bam                   |
| wgEncodeSydhTfbsMcf7Znf217UcdAlnRep1.bam                   |
| wgEncodeHaibTfbsT47dEraaV0416102Bpa1hAlnRep1.bam           |
| wgEncodeHaibTfbsT47dEralphaaV0416102Est10nm1hAlnRep1.bam   |
| wgEncodeHaibTfbsT47dFoxa1sc6553V0416102Dm002p1hAlnRep1.bam |
| wgEncodeHaibTfbsT47dJundV0422111AlnRep1.bam                |

**Supplementary Table 6:** The identifiers for the ESR1+ and TNBC tumours used in the MuSE analysis

| ESR1+   |         | TNBC    |
|---------|---------|---------|
| PD3989a | PD4986a | PD4086a |
| PD4069a | PD5928a | PD4107a |
| PD4072a | PD5936a | PD4109a |
| PD4080a | PD5947a | PD4248a |
| PD4224a | PD5951a | PD4255a |
| PD4225a | PD5956a | PD4833a |
| PD4261a | PD6041a | PD4836a |
| PD4266a | PD6042a | PD4841a |
| PD4267a | PD6043a | PD4847a |
| PD4315a | PD6044a | PD4955a |
| PD4604a | PD6045a | PD4975a |
| PD4605a | PD6049a | PD4980a |
| PD4606a | PD6417a | PD5934a |
| PD4607a | PD6418a | PD5935a |
| PD4608a | PD6422a | PD5942a |
| PD4613a | PD6466b | PD5944a |
| PD4951a | PD6719a | PD6018a |
| PD4952a | PD6720a | PD6046a |
| PD4953a | PD6721a | PD6409a |
| PD4954a | PD7199a | PD6410a |
| PD4957a | PD7201a | PD6411a |
| PD4958a | PD7207a | PD6413a |
| PD4959a | PD7208a | PD6722a |
| PD4962a | PD7209a | PD7217a |
| PD4963a | PD7210a | PD7321a |
| PD4965a | PD7212a |         |
| PD4966a | PD7214a |         |
| PD4967a | PD7215a |         |
| PD4968a | PD7216a |         |
| PD4970a | PD7218a |         |
| PD4971a | PD7219a |         |
| PD4972a | PD7221a |         |
| PD4976a | PD7433a |         |
| PD4981a | PD8618a |         |
| PD4982a | PD8622a |         |
| PD4983a | PD8623a |         |
| PD4985a |         |         |

Supplementary Table 7: Capture Probe Sequences

| Chr. | Start     | Stop      | Sequence                                                                                                              |
|------|-----------|-----------|-----------------------------------------------------------------------------------------------------------------------|
| 6    | 151906302 | 151906422 | +GGGAGCATTGGGCAAATCAGGTGGGTTGTGGAGAGCTGGAGGACTTAAACATGGGACAGTACTCAGATTCCCCTGCTCTTGTACATTGACACTGACCTTATTAGAGTACCAATAT  |
| 6    | 151906482 | 151906602 | +AGTCAGCATCCCTGGAGTTTAGGGCATAGGTAACCAATCTCAACAGAAAGCTGAAAAAGTTGAAAAAGCATATATCTGTACATGAATCCCTGTAATACCTCAATGTIACCTACCAA |
| 6    | 151906662 | 151906782 | +TGACTCTTTGTAGATTTTACAGTACTTTTGTCTTAATCTTTTCTACTAACTTTGAAACTCTTAGCAATAGTTTGGGGTAAGTAAATGTATCCATAAATTTTATTGATTAAC      |
| 6    | 151924390 | 151924510 | +TATTATCTTTGAGTTGGCATGTTTAAAGTTGTTTCCCTAAGGATAGGAGTATTGTACCATTGTTTATTTAATACTGCAGATACTTATTGTACCTATGCCATGACATAG         |
| 6    | 151924561 | 151924681 | +ACCATTCTTATTAGCCAGGATACTACTAATTTGGCACAACATAGCTTATACACAAATGCAATGCCAAGTACTGAAATCATGGGGCAGAATGGCAGAAGATGAAGAAAGTGTCTT   |
| 6    | 151925061 | 151925181 | +AGAAATGGGCTTTTCTGTACAGTAAGAAATAAGTAAGAAATAGCTATTGGTGGAGAGCCATCAGTACTAGCTATATCATGTGGCCCACTTAGTAAGGAGTATGGCCGAAGA      |
| 6    | 151925229 | 151925349 | +GCACCTTTCAAGGAAACACCAAAAGGATTAACATCTTCAGCCACCTGTGAAGTCTCTCCCACTTTCTAACTCTCTTTTATATCTCCACACAAGACAGCTCTCCCCACATCTCTTC  |
| 6    | 151925397 | 151925517 | +TTTTCCCTGAGCTCCATCTCATACTAGCTCCGATGATGATGATCATTGGATTTCTGGGACTGCTTTGAGCTTTCCCACTCTGAACGTATACAGCAAGCAGATCTCCAGCAAGA    |
| 6    | 151925789 | 151925909 | +GCTCTACGGTAGGGAAGGAGGGGAGGTAGGCCAGACTGCAAACTGCAATCTCACTTTGATTTCTGTACTCTGCTTAGTTACACTTTTCTTTCATTTTAGTTTACATAIA        |
| 6    | 151928274 | 151928394 | +GTTTGTGGTGGCAGTAGAGCAGGCAATTGAGACAGAAAAATCCCTACTAAGTGTGGGTACGGGGGTGACCTGGAGAGAAATGATTTTTCAGTATATTTTAAATGAG           |
| 6    | 151936750 | 151936870 | +GGTAACAGTGAATGAAGACACTAAAAATCTCTGGAAGAAGCAGAAAAGAGAGAAAAGCAGGTGGGTCTAAATCTGGTATGAAACCTGTTTAGGAAATGACAGGCAATCAAGA     |
| 6    | 151937051 | 151937171 | +TCTATCTTTTCAACATATCCACTGCCCTCCAGCACTTTTGGCATCAAGTAACCACTATGATTTACCCCGCTAAGAAAAATATTCACATTTCCATGGCACAAATGTAGGAAA      |
| 6    | 151937222 | 151937342 | +TTCTGGTCTGGGGAGGTTTGTATGTAGGTGATGCCTCTGAAGTTGCTATCATAGAGCTCTTAAAGTAAACAGGGCTTTGGCCCTCAGGAGGGAAGCTTATCTGTAGCAGA       |
| 6    | 151937393 | 151937513 | +ATGGCCAGCCAGGCACAGATGAAGCCATAAAAGTACTCAATTTGCTGTGGCTACAGAAGGAGCAATTTATCTAGTGGTCCATCAGGAGGTCAGGCTAAAGAAACATGTACCCG    |
| 6    | 151937564 | 151937684 | +TCAAAAGGGCATAGAGTGGACTGTATCTAGGATTTTTTCCCTGCTTGGCTGCCTCTGTTTGGTTCATGTGTCAGCAGAGCAGGGAAGCAACACACAATGAGCGTCT           |
| 6    | 151938163 | 151938283 | +GGAAGCGGTTGCAGAGCAAAATGAGCTGGGGTGGGACTGTTGGGTGGCACTCTCTGGATTAACCTGATTCAGTTTGGATCATCCCTTTCTAAATGGAGGGTGCCTTTAATGAGG   |
| 6    | 151938331 | 151938451 | +ACAGAAACAGCCTAAGAGAAATGAAGGGATATGAGGCATATTAACCAATTTGCCAGCCCTACTTTCTTTCTCAATGGACAAATGAGAAATCCAGAGCAGTCCCATGGAATAT     |
| 6    | 151938862 | 151938982 | +CATCAGAAAAGTATGTGAAATCTGAAAGTTGGCAGTTGATGTGACTTATCTGGAATCTGGTATTTAFAAGTGAGAGAACTAGGAAGAGAGTAGATAATTTCCCTACCTCATGCAA  |
| 6    | 151939042 | 151939162 | +TTGTCTCCAGTAAATGAGTTCTGTTTATATGATGACAGCTGGCAGACTCAGGGAGGTTGGTCCGAGATGCTAGGCTGGAACGTGACCAAGCTTGTCTCTCTGATTGAAATCATC   |
| 6    | 151943940 | 151944060 | +AACCAAAAAACCCACCATGAGTCGAGAAAAAGAGACACCCCTGTCTCAAGTTCATGCAAAAATATAGCCGAGAGGCTGATCATCTTCCAGGTCAATACGATCTTGAAC         |
| 6    | 151944252 | 151944365 | +ACACACACACACACACACTCTGTGACACGTGGCTGTGAGCACTAACCACTAGAATATGATCTCTGAAATCTAACTAAAAAGCTTCAACCTCTTACCATCCCAA              |
| 6    | 151953971 | 151954091 | +CTGCAAAATTTCTCCAGCAAGTTTTAAGGTAATAATGTTGAGAGATTAATAATTAATCTGAGCAATGTGAAATAAAAAATAAGTTAAAAATAAACAGAAATAATATAGCTAT     |
| 6    | 151954127 | 151954247 | +TGATGCTTAAACAAATCTGTTTTTATGTAGGAGGAGCATATACAAAATTTCTTGTGAGTTGCAAAATGTAGTAGGAAAAATACCAAGAAATACATGATCTAAATAAAGGCTGA    |
| 6    | 151954467 | 151954587 | +GCATACCAGTTAAAAATATCTCAAAATTTCTATGAACTGGATTTGCAGAAACAATCTAAGTGTGTAGATGACCAGCTCGTGCCACTAACACATTTGGGCCATATATGATGAT     |
| 6    | 151954804 | 151954924 | +AACAAATGTTGCCATTATACATCAAAACAATGACAGCAAGCAATAAGCTGTGTTGTCATAAGCAAGGGAGGAATGCCAGTCTCCCTGGTAGAGGCAGACTAACCTTGGAACTAGA  |
| 6    | 151954984 | 151955104 | +GTGCACCTGGGTAGTATCTTCTGCTGATATCTTCTCTGTACTGTGGCTGACCTTTGACCAAGGACGCTGCTTAAAGGTTCTGGTGGGACAGGCATATTTGAGCATACCCA       |
| 6    | 151955164 | 151955284 | +TATAGACCTTACACAGGCTCAGTGGAACTGAATCACAACCTCTGGGATTTGAATGATTCAAATCAGTGAATCACTCTAGTTGTGAGTACAGCCATAGAACCACACACTAA       |
| 6    | 151955344 | 151955464 | +GAAAGAGGTGCTAAGGCTGACAAGATGTTAACTATGAGTTATTAAGTTTTTCAGGGAAGTCAAAAACATGGACTCTGTGCAATAGGAATGATGTGACCTCAATAATATAAAGAC   |
| 6    | 151960855 | 151960975 | +CCATGTATGATAIACATTAATAAATCAITTTGTTATTTGGTAAACATGAGGCTGTTTCTACTTTTGGTTATATGAGTAAATGCTGCTAAAAACATGTAIACAAGTCTTGTG      |
| 6    | 151961035 | 151961155 | +AGTAATGCTATGTTTACCTTTGAGACATGCAAAATTTTCCAAAGCAGCTGCACATATAAATCCACCAGCAATGATGAGGATCAATTTCCACATGTTGTGCAACACTT          |
| 6    | 151961215 | 151961335 | +CATGCTCTAATAACTATAATGTTGAGCGTATTTTCAATGCTACTGGCCATTTGTACATCTCTTTGGAAATATAIATCACTCCCTTTTGGCCATTTAAATGTTGATATATTT      |
| 6    | 151978583 | 151978703 | +TAAGGAAATGAGTCCCTTAGGGAGAAAATGTTCTAAATTTATTTGGTAAATGTTGCTGACTAACATGTTTACTGAAATGGATCACCATGGGTGTTTAGGTTTTGTTCTTT       |
| 6    | 151978763 | 151978883 | +GTCCCTTAGTTAAATATATGCAATTTTCTGCAAACTAICTGAACTGAAAAGGCCAGAAAGGAAATAGCGTGGTCCAGAGTAGATGGACTGCAAAATGTTACACATAATTTCAA    |
| 6    | 151979023 | 151979143 | +GGCAAAAAAAGATGATGACCAAGTGTGCTACTTTTAAAGCTTATGTTTCAAAATATTTTAAATTTAAACCAATCAAGTGCATCCCAAAAAACATGGAAAAATTTGAGGC        |
| 6    | 151979310 | 151979430 | +CTCAGTAAATATTTATGATGGTCTGATATGGATGATGAAATATGCTAAAGGTAACCTAACTTTGTCATAAACCAGGTTTCCAGTTAGTTGACCTTTCCGTAICTCTAAAT       |
| 6    | 151979490 | 151979610 | +CTTTCCCTCTGGTATCTGAGCTAICTCACTCACACAGCACCAGTGTATGTTGCTGTTTGTGTTAAATCACTCATATAATTTCTCAITCAATAAATAAGTATGAT             |
| 6    | 151979670 | 151979790 | +TCATTTGTTTCCATCCACATAAATGTTGATGCAATATGAAGTGAATATAAATAAATATGCTTTTATTTATTTGTTTATTTTACTTTAAGTCTGGGATATAAT               |
| 6    | 151980046 | 151980166 | +GGCATAGATGAGCAAGAACAGGTTTTCTGAAAGTGGCCAGTCTAAGGCTTAGAAGAAGAAAGCTCGGGAGCCTAAACCAAGATATGCTAAGGCAAGTTTTTGTGCTGTTGTTTTG  |
| 6    | 151980427 | 151980547 | +GTGAGCAGTGTGCCCGGCTGTAAGGCAAGTATGACCATTAGAGGAGATGACTAGTCCAGTGGCAGGCTTCTACTGGGAGTCAGCAAGAGCTCCCACTCTCTGGTCCAT         |
| 6    | 151980607 | 151980727 | +AATCCAGTCTTTTAGCACTGAGTTTCTCATAGCTTTTACCATTGAGTTTCTCATGGCTAATGAATGCTAATGAATGGCATTCAGATTTCACTATAGGATCCATGAGTCAGCT     |
| 6    | 151980787 | 151980907 | +GAGTAATCAGCAGGCAATGTTCTCTAATAACACTCCAGTCTACTGAGAGCTTCTAATCAAAACAACATTAAGGCTTACAGTGTGACTTCACTAACTAACTGAAAAAGAAATAGA   |
| 6    | 151986219 | 151986339 | +CAAGTTTTGTGAACACCAAAATCCATTTGCTGTGTGTGGAGGGTGGTTAGGATGGTAGAATAAATCTTTGCAACGGCTGCACCTAGCATGGTCCCTGAAAGCTTGGAGT        |
| 6    | 151986399 | 151986519 | +AGAGGATTCACAGGGTAACAGGAACCTGGACTGAACTGAGCTCTGCACTCCGAGATTTTTTAAAGTGGTTGTTTTTAGAAGTGTGTCACAGCTCTAAATCATGTAAATTC       |
| 6    | 151986579 | 151986699 | +GATCTGGAATCAGAAAGCCAGAACTCAAGATGGAAGCCAGAGCTTAGCAAGTGAAGCTCTGCAATCTGGAGCCGAGATTTGACCAGCTGTGCACAGCTTCCACTGTGGC        |
| 6    | 151986759 | 151986879 | +TTGCTGAAATCATCACTCCCTTCCATGCGGAGACTTAAAGGTTTCAAACTTCAAAATCAAGTATTTCAATCACTCAGATGACTTACATACAATGTTTATACATTT            |
| 6    | 151987494 | 151987614 | +TCTGCTAATAATCCCAACATTTCTACAGGAAAAGTGCATGTTCTGCTGTTGTTGAGAGGGCCACCAAGGAATCAGGTTCTGGTGGTAAAGATGACAGAAATGACCAAGCT       |
| 6    | 151987674 | 151987794 | +TCTTCTGATTAACTATGAGCTCTGTTCTTCAAAAGTACTGGAGTCTGGCTTAGCACATCTGTTTCTGAGCCAGAGCACTTCACTGAGAAGCAGACCTTACTTGGCTGG         |
| 6    | 151987861 | 151987981 | +CCTCTCTCTCTCCAGGAAACATATGTTGGCAGCAAGGGTGCAGAAAGTAAAGGCAATGAAGGCAATGATGATGCAATGTTGAGGAGCAAGGTTCTGTTTTACTCTCAGTGCACAAA |
| 6    | 151991638 | 151991751 | +CGTTTGTGAATAAATAATGATACATCTTCTGTAATATGAGAAAGTGGGAGGCAAGCTTAGGTGAAGAAGCACTTAAAAAATTTTTTTTTGAGACAGCTTGC                |
| 6    | 151996502 | 151996622 | +ATGGTAGCTCAGTGTCTCGATGCTGGAATTTGTTCTAATAAGTTCTGAGCTGTTTATAAACCAAGAGGGTAGGGGAACTAGTAGTGAATCTCTTCTCTCTCTCTCTCC         |
| 6    | 151996682 | 151996802 | +AAAAAATCAGTGTACAAAAATGTTGACATTTGGAATACTTACACTTACATAGTGTCTTAGTATAGAAACAAAAAGCCATCATTTAGGCTAGATTTTCAAGATGATCAC         |
| 6    | 151996862 | 151996982 | +TTGCTGTAGCATAATTTGGCCATTAACATAAGCATTGTTGAGACCCGTAAGTCAAGCCAGGCTATGGTGAACAAAAATAGCAAAATCGAATGATGCGGAAACTGGTGAAG       |

|   |           |           |   |                                                                                                                        |
|---|-----------|-----------|---|------------------------------------------------------------------------------------------------------------------------|
| 6 | 151997042 | 151997162 | + | GGTGGGGCAGCAGAGAGCTGGCTGTGGTCTCCAGAAGGGAAGGCCAGCACCTGCCTGCAGATTCCAAGGCACAGGTGGAGGTGGTAATGAGTACGAGGTAGAGTCAAGGTTGGAGCTG |
| 6 | 151997222 | 151997342 | + | AAGCCAGAATGGAAGTAGGACAAAGAACTGGTGAAGTCAAAGAGCAAAGGTGCAGGGGTACAGGGAGGAGAGGTTGGGTGGGCAGACAGGAGGTGCCGAAGGAGGCCAGCCTGCTTC  |
| 6 | 151997402 | 151997522 | + | TGGTCTTCCAAGGGCTATGAAGGGACAGGATGTGAGAGACACCAGCCATCTCTCTCTGAGCTATTAATAATGAAAGTTCCTGTTTTATGAACAAATAGTAAATGAATGGAGAACA    |
| 6 | 151997582 | 151997702 | + | GGTTCCTGCAAAAGGACTAAGTCTCAGCAGCCTGTGCCATCTTTTCGGAGATTTTCCACAATCACCAGGAAATATAGTTCAGTGCCTGTTTACTTAATGGTCGGTACGCTTGAA     |
| 6 | 151997762 | 151997882 | + | ACCCCAACACATGGGCAGCCTTCTTCCAGACTTGGCACCCTCAGTGCCTGATTTAGCACCCCTCATGGGAAGGCATCCTGGAGATCCCTATCTGCACCCTGTCTCCATCACCCT     |
| 6 | 152023884 | 152024004 | + | AAGTCCATTTCTATTCTCCATAGAACATTTAAACTAGTTCACAACTCTTGAAGTCAATGCTCTAGAAAGTGAATGCAAAATGTCACCATTGCCTAGAACCAACTTGAGAGGCTG     |
| 6 | 152024064 | 152024184 | + | ACCCCTGATTTGTGAATATCTAGCTTCAAATGTTCAAAAGCACAGGAAGTTCGACTTTAAAAATATAACCTGCCAAATGCAAGGGAGGGGTTGGGTGAGGACTAGGTC           |
| 6 | 152024244 | 152024364 | + | GGCAAAATTAAGTACAGCTGGTAATTTCTAATGTGAAGTGGCTGTTGGTGAAGTATTCAGGAAAATTTAGCTGGACCTTTCTACCTACTGCATAAGAAATGAAGGTTTCT         |
| 6 | 152024424 | 152024544 | + | TTAGTACTGTCTCAAACAGCTCAGGACTGGTACGGCAGTCTCTGAGGCTGGAGGTCATGGAACCCCAAGGCTTGTCTGCAAGGGCATGGTACTGCAGGCTGTTTAGA            |
| 6 | 152024604 | 152024724 | + | TCTCTGCTCAGAGCTGAGCAGCTGTAATGAGCTCTCTGTGAATCAGAAAATGTTAATGGGTGAGTGTCTAGCTTCTTACTTCAAGTGAAGGCGCTGTAGCTTTTGGCAGC         |
| 6 | 152024784 | 152024904 | + | AAAAAGATTTAATATAGAAACGAGTCTTCCATCTGGCTGAGGCTGAACAAAGTAGAAGAACAGTGAAGTACTGGGGTATGGATCTATACCAATTTACAGATATACCTCCCTTC      |
| 6 | 152024964 | 152025084 | + | GAAGTCTTAGATCCAAACTTTGATCCAGAAAGTCTAAGTGTCTTGTCTGAGATTTGAAGAGAGCTGAGACAAACTGTGGGATCTAGACGCTATTGCGCACTGCCTGGGTAA        |
| 6 | 152025144 | 152025264 | + | TTATAACAACACAGAACATCAGTGGTCTCCCAATAATCAATATAATTTGGCTCTATAATATAAAATTTGACTTGTAGTAGAAGATTTCAAGGCTAAAAATAAAGATGATAAT       |
| 6 | 152027473 | 152027593 | + | TTGGCAACAGGAGGATGACTAGTGGGCTGAAAGTATCCACTGCTGTTTCTGTTAACTTCTCTAATCTACTGGGCTTGGGAAGAAGAGTACGGGCACTGTTTGCCTCA            |
| 6 | 152027653 | 152027773 | + | GCTCCACAGGGCATGTTTACTTGTGGCGGTGAGTCTCTCAGGTAAGGTTCTGGGATAAGAGCAAAGCTTATGGTTTTCCTGCTGTCACGAGACACACAGATCACC              |
| 6 | 152027833 | 152027953 | + | TTACTCAGGAGGAGAAACACAGAACACATGGAGGAAGTGTCCAGTGTAAAGCTTTAGACCAAACTATAGAAATCTGTTACTGGAACCTGAAGAAATAATCATGACTGCT          |
| 6 | 152074792 | 152074912 | + | AGTTTGGTGCACAGATATGCGGTAGTGTCTATCTAATGTGTCAAATTAATAGTAAAGATTTGGCTTAACCTTGTGACATGGAAATTTATATCTCCAGTTTCTGGTTTAACT        |
| 6 | 152074972 | 152075092 | + | TCCTTACCTAATTTGACTTGCCACTTTTCTCTGTGGGCTGTCTCTAGAACTCAATGATTTCTGTTGGGTGACATCAGCTGCTACTCGGGGAAGAAATAGAATTTATGGTGC        |
| 6 | 152075152 | 152075272 | + | AGGGGATAAAAGAGAGAAATCAGAGATGCTCCCAACACAGAGAAACCTCAGAAAGCAGCAGGAAAGACAGAGTAAATGGAGAAACAAAACCTAAGTCAAATAGTCAATGAAATAA    |
| 6 | 152124642 | 152124762 | + | GGGCAGAGAGGAAGCCCTGAACCTATGGGGGAAGCTAATGTTGGGTAAAGACAGAGCTGGGTCATGTAAGATGGATCTGAAGCAGTAAATAATCAAGAAAGTAAACAGGTTG       |
| 6 | 152124822 | 152124942 | + | CAGGTAAGGTAATGGTCTCAAAGGAGTGGCCAAATGCAATGGAAGAAAGAGAGATGTAAGCTAGAAAGCTTAGGAATTCCTTGTATAGGTGGGAAGGCAAGGAAATCAGC         |
| 6 | 152125002 | 152125122 | + | AGACACGGGAAGTTGAGAGAACACCATGTTGAGAAATGGTACTCATATTTGAACAAGCTGCAATGCCAGCAGACCGCTGGAAAAGTGGGGTGGAGACACATCAACGGAGGAGC      |
| 6 | 152125182 | 152125302 | + | TGTCCAGCAGGAGGGGTAGGAGGGAAAGCAAGAGAGCTGGGAGCCGAGTGAAGTTTTGCCAAAGCAGAGAGGAAAGTCGGCTAGCACAGTATACTTTCCACCCATGCTCACC       |
| 6 | 152125362 | 152125482 | + | TAAGAAAAGTCTTACTGAACCTTCTGGGCTAAGTTGATGTAAGTCTCTGAACAATCAAAGCTGTGAGGAGACAGTAACTTCTTATCTTCCATGTAATGAAACAATG             |
| 6 | 152129702 | 152129822 | + | CCGGGCAGTGAAAAAAGTACTCTCCACCCACTTACCCTCCGTCGAGAGGACAGCCGAAAGCCGGGCTCTTAACAAAACACACGTTGAAAACAGACAAAGCAGCAGTATTT         |
| 6 | 152129882 | 152130002 | + | TCGCTCTGGCATTAAAGTTGGGGTGTGGAGTGTAGCAGCTCAGCAGAGTTTATTTATCTTTTAAAGTTTTGTTTAAATGTCCTCCCAAAATTTCTTCTCAGACTATTT           |
| 6 | 152130062 | 152130182 | + | TCCCTCTCCCAACCCACGTCCTGGGGCTTAGAGAGCGAATGGGAGTTGAATGGGTGATTTCCGGAGTGTAGCTGGCTGAGTCCCGCTGGAGCGGATGCTGGCATGTACTCTG       |
| 6 | 152130242 | 152130362 | + | CTTAAAAATAATCTCTGCCAGCCAGTGAACAAGCTGTCCACCCGGGAGAAATGCCCGGAGTGGGTGCGGGTCAAGCAGGCTGCCTCGCAGCAGCTGGAAGGAGCGCGGC          |
| 6 | 152180661 | 152180781 | + | ATCACAGACCAGGACTCAGACCTGTGAGGACCTTAGCCTTACCCTCCTCTTCCATGTGTCAGCTTCGCGTCTCTGTCTGCAAGTATGCAATTTCCCTAAGTGGGAGAGCAGAG      |
| 6 | 152180841 | 152180961 | + | AAGGACTCTGTTGGCCAGCTTGGGACACACTTGGACCAACTAGTGTCTCAGGAGGAGTAAATGATACAGAGGTGATCCCTGGGGTGCCTGTGAAATCATGTGAGGCCAA          |
| 6 | 152181126 | 152181246 | + | ACCTCTGTTGGCTCTATCCCATCCCTATAGATATCTTCTGCTGAGACTAAGCAGAGAAAATAATTAACATTAATTAATGATGCTTAAATCCACTTTTACTCTTCTTCTT          |
| 6 | 152198631 | 152198751 | + | ATGATCTGTGTACATATTTCCATTTTGTAAAGAGACGAATCAATGTGAAAAATCTAGTACTTTTATTCATTAACATGTTAGTTCAGGAATTCACCTGGTGTACAAAAGATA        |
| 6 | 152198811 | 152198931 | + | TTAGTCTCTCTGCTCTTCTGGCTTACAAAGTAACTGGCTGGGGAGAAAGTGAATCAAAGTAAATTTGGTTTGAATGGTTTATGACTTATTTCTGTAACCTTAATGTAATA         |
| 6 | 152223083 | 152223203 | + | TGCCTCTTCCACCATTTTTTGGCCTTGACGATTAATTAATTTGATTTGAAAGTTTGGCAGTTTATTTTGAATAATTTACATAACAAATGCCAAGCAAATCCAACTTCTTGG        |
| 6 | 152360309 | 152360429 | + | GCAGGTCATGTTCTTACCTGGTGGAGTGTCCCAACCTTCACTCTGAAGGCTGTGGCCATTTGATGCTCTGCTGGATCAGATGTTGTCATTTTATGACCTTAATCAGAGG          |
| 6 | 152360489 | 152360609 | + | CCTTCATATGGAGTAGTAGACTGATCTATCTGTATAGCTAAGTCACTCAGTCAACCCAGCAACACTAATCTTCTTAGCCTGTGACTTAGAGGTAGGAGGAGCCGAGATTGCAATC    |
| 6 | 152360669 | 152360789 | + | GAACCTGAGACTTCTAGCCAGCAGAACGTAATGCTGTGGAACAAGAAGCACAAATTTACTAGCGGGTCTTAGGGGTGATGGTGGTGGCTCAATTTCCACCCCTGATTTCT         |

**Supplementary Table 8:** Somatic mutations identified within the *ESR1* SRE.

| Mutation           | Sample ID | ESR1/ER $\alpha$ Status |
|--------------------|-----------|-------------------------|
| chr6:152125116:G>C | PD6417a   | Positive (ESR1+)        |
| chr6:151979376:T>G | PD4847a   | Negative (TNBC)         |
| chr6:151937492:G>A | PD4966a   | Positive (ESR1+)        |
| chr6:151937744:G>C | PD4072a   | Positive (ESR1+)        |
| chr6:151954506:C>A | PD5942a   | Negative (TNBC)         |
| chr6:151955192:A>G | PD7214a   | Positive (ESR1+)        |
| chr6:151924498:T>C | PD4983a   | Positive (ESR1+)        |
| chr6:152024472:C>G | PD6719a   | Positive (ESR1+)        |
| chr6:152360637:T>C | PD7219a   | Positive (ESR1+)        |
| chr6:151923842:G>T | PD6722a   | Negative (TNBC)         |
|                    |           |                         |
| chr6:151979547:A>G | RCT_41    | Positive (ESR1+)        |
| chr6:151955219:G>T | RCT_15    | Positive (ESR1+)        |
| chr6:152075097:G>C | RCT_51    | Positive (ESR1+)        |



Supplementary Table 9: Experimental primers.

| Experiment               | No.       | Sequence                                                     | Description                                                                                   |
|--------------------------|-----------|--------------------------------------------------------------|-----------------------------------------------------------------------------------------------|
| ChIP                     | ChIP_01_F | TTCTGTGCTTTTGTGTGGAC                                         | rs9383590 forward                                                                             |
|                          | ChIP_02_R | TGAACAGACACTTTGCCAGA                                         | rs9383590 reverse                                                                             |
|                          | ChIP_03_R | GGAAACTGAAAATTAAGCAATAATCA                                   | Reference MAMA primer (T)                                                                     |
|                          | ChIP_04_R | GGAAACTGAAAATTAAGCAATAATCG                                   | Variant MAMA primer (C)                                                                       |
| Cloning                  | Luc_01_F  | AATATAGGATCCAGACAACATGCCAGCTGGGTAT                           | Chr6:151924498 mutation-containing enhancer                                                   |
|                          | Luc_02_R  | ACAATAGGATCCATTATCCATTGTATACATGCATCAAAATATCACTCTGT           | Chr6:151924498 mutation-containing enhancer                                                   |
|                          | Luc_03_F  | ACGATAGGATCCGGTTCACCTTTAATGTTGGA                             | Chr6:151954506, chr:151955192 mutations and chr:151953765 genetic variant-containing enhancer |
|                          | Luc_04_R  | ACGATAGGATCCTTCCATATTAGATCATAGAGCAA                          | Chr6:151954506, chr:151955192 mutations and chr:151953765 genetic variant-containing enhancer |
|                          | Luc_05_F  | AATATAGGATCCGAAAGTGCAAATGTCACCA                              | Chr:152024472 mutation-containing enhancer                                                    |
|                          | Luc_06_R  | ACGATAGGATCCATATATTTGATTATGGGAGAACCAC                        | Chr:152024472 mutation-containing enhancer                                                    |
|                          | Luc_07_F  | ACGATAGGATCCTGGATCCTGAAGCAGTAAAAAAAAT                        | Chr:152125116 mutation-containing enhancer                                                    |
|                          | Luc_08_R  | ACGATAGGATCCACAATAAAGTAGCCCAAGAGT                            | Chr:152125116 mutation-containing enhancer                                                    |
|                          | Luc_09_F  | ACAATAGGATCCTAGTCTGCCTGGATCGAGT                              | Chr:152360637 mutation-containing enhancer                                                    |
|                          | Luc_10_R  | AATATAGGATCCGTGCTTCTTGTCCACAGCATT                            | Chr:152360637 mutation-containing enhancer                                                    |
| Mutagenesis              | Mut_01_F  | ATACTGCAGATACTTATTGTACTACGCCATGACATAGTTGG                    | Chr:151924498 (T -> C) sense                                                                  |
|                          | Mut_02_R  | CCAAACTATGTATGCGGTAGGTACAAATAAAGTATCTGCAGTAT                 | Chr:151924498 (T -> C) antisense                                                              |
|                          | Mut_03_F  | TGCATACCAGTTAAAAATATCTCAAAATTTCTATGAAAATGGATTGTGCAGAAACAATC  | Chr:151954506 (C -> A) sense                                                                  |
|                          | Mut_04_R  | GATTTGTTCTGACAAATCCATTTTCATAGAAAATTTGAGAATATTTTAAACTGGTATGCA | Chr:151954506 (C -> A) antisense                                                              |
|                          | Mut_05_F  | CACCAGGCTTCAGTGGGACCTGAATCACCAACT                            | Chr:151955192 (A -> G) sense                                                                  |
|                          | Mut_06_R  | AGTTGGTGATTAGTCCCACTGAAGCCTGGTG                              | Chr:151955192 (A -> G) antisense                                                              |
|                          | Mut_07_F  | GTCAGGCCAGTCTTGTGAGGCTGGAGG                                  | Chr:152024472 (C -> G) sense                                                                  |
|                          | Mut_08_R  | CCTCCAGCCTCACAAGACTGGCCTGAC                                  | Chr:152024472 (C -> G) antisense                                                              |
|                          | Mut_09_F  | GGAGACACATTCACCGAGGAGCCAGATCAATC                             | Chr:152125116 (G -> C) sense                                                                  |
|                          | Mut_10_R  | GATGATCTGGCTCCTGCGTTGAATGTGTCTCC                             | Chr:152125116 (G -> C) antisense                                                              |
|                          | Mut_11_F  | AATCTTAATTTCCAGTTAATGAAATCATTACTGTGCTCCTGGTGGC               | Chr:152360637 (T -> C) sense                                                                  |
|                          | Mut_12_R  | GCCACCAGGAGACACAGTAATGATTTTCATTAACCTGAAAATTAAGATT            | Chr:152360637 (T -> C) antisense                                                              |
|                          | Mut_13_F  | GGAAACTGAAAATTAAGCAATAATGGGATACAAACACATACCTATTAGAATG         | Chr:151953765 (rs9383590) (T -> C) sense                                                      |
|                          | Mut_14_R  | CATCTAATAGGTATGTGTTGTATCCCAATATGTCTTAAATTTTCAGTTTCC          | Chr:151953765 (rs9383590) (T -> C) antisense                                                  |
| CRISPR                   | RT_01     | TCCAGATGCCTAATGTTGGA                                         | ESR1_F                                                                                        |
|                          | RT_02     | AGCAAAATTAGCTGCCCTGA                                         | ESR1_R                                                                                        |
|                          | RT_03     | GCACCCGAACATTAGGAGAA                                         | CCDC170_F                                                                                     |
|                          | RT_04     | ACATACCGGCTCATTTTGG                                          | CCDC170_R                                                                                     |
|                          | RT_05     | TAGCTTCTGGTGCCCATCT                                          | ARMT1_F                                                                                       |
|                          | RT_06     | AACCCAGCTATCCCCAAAAC                                         | ARMT1_R                                                                                       |
|                          | RT_07     | CTCGTCCCAGCTCAAACATT                                         | RMND1_F                                                                                       |
|                          | RT_08     | CTTCAGCACTGCATGGAAT                                          | RMND1_R                                                                                       |
|                          | RT_09     | TGGCAGCTGCTAGAAAATGG                                         | ZBTB2_F                                                                                       |
|                          | RT_010    | TTGCTGGCTTCTTTCCAAGT                                         | ZBTB2_R                                                                                       |
|                          | RT_11     | TTCCCCGTCACCTGTTTATC                                         | SYNE1_F                                                                                       |
|                          | RT_12     | GAGGATCGGGTCATAAGCAA                                         | SYNE1_R                                                                                       |
|                          | RT_13     | GGACTTCGAGCAAGAGATGG                                         | Actin_F                                                                                       |
|                          | RT_14     | AGCACTGTGTGGGCTACAG                                          | Actin_R                                                                                       |
| Viability assay          | RT_15     | CTCGTCCCAGCTCAAACATT                                         | RMND1_F                                                                                       |
|                          | RT_16     | CTTCAGCACTGCATGGAAT                                          | RMND1_R                                                                                       |
| Deletion Validation      |           |                                                              |                                                                                               |
| chr6:151924219-151925969 |           | GAGATGGAGTCCGCTCTTGT                                         | primers to verify deletion of the enhancer chr6:151924219-151925969                           |
|                          |           | CAACATGGATGAGCTAGAGGA                                        |                                                                                               |
| chr6:151953109-151955347 |           | TATTTGGAGCGGTTTTGG                                           | primers to verify the deletion of the enhancer chr6:151953109-151955347                       |
|                          |           | CCACTCAAGCAGCTCACTT                                          |                                                                                               |
| chr6:152023958-152025191 |           | AGCAAAATGTGAGTGTGCTTTT                                       | primers to verify the deletion of the enhancer chr6:152023958-152025191                       |
|                          |           | AAAATCGCTTGAACCGGGGA                                         |                                                                                               |
| chr6:152360377-152360720 |           | ATGCACCAATCCCAACCAA                                          | primers to verify the deletion of the enhancer chr6:152360377-152360720                       |

|                            |                 |                                       |                                                                                |
|----------------------------|-----------------|---------------------------------------|--------------------------------------------------------------------------------|
|                            |                 | CTGGCTACAGCCACAACCTGA                 |                                                                                |
| CRISPR (T-47D Stable Cas9) |                 |                                       |                                                                                |
| chr6:151924219-151925969   |                 |                                       |                                                                                |
|                            | CRISPR_crRNA_1  | CUUCAGCCUCUUGAGUUGCGUUUUAGAGCUAUGCU   | crRNAs targeting the enhancer chr6:151924219-151925969                         |
|                            | CRISPR_crRNA_2  | AUCCUGGGCUAAUAAGAAAAGUUUUAGAGCUAUGCU  |                                                                                |
|                            | CRISPR_crRNA_3  | GUGAAAGCCAACUAUGUCAGUUUUAGAGCUAUGCU   |                                                                                |
|                            | CRISPR_crRNA_4  | UUAGCGUUCUAAAGCACUAUGUUUUAGAGCUAUGCU  |                                                                                |
| chr6:151953109-151955347   |                 |                                       |                                                                                |
|                            | CRISPR_crRNA_5  | UGCCAGAGAAGAUAUACAGAGUUUUAGAGCUAUGCU  | crRNAs targeting the enhancer chr6:151953109-151955347                         |
|                            | CRISPR_crRNA_6  | AGCAACACCAAUUGCUGCCAAGUUUUAGAGCUAUGCU |                                                                                |
|                            | CRISPR_crRNA_7  | GGUAGAGGCAGACUAACCCUGUUUUAGAGCUAUGCU  |                                                                                |
|                            | CRISPR_crRNA_8  | AGUCGUGUUUGCAUAAAGCAGUUUUAGAGCUAUGCU  |                                                                                |
| chr6:152023958-152025191   |                 |                                       |                                                                                |
|                            | CRISPR_crRNA_9  | AGCCAUGCCACUUGUAUUUGUUUUAGAGCUAUGCU   | crRNAs targeting the enhancer chr6:152023958-152025191                         |
|                            | CRISPR_crRNA_10 | CCCCAGAGCCUUGUCUGCAAAGUUUUAGAGCUAUGCU |                                                                                |
|                            | CRISPR_crRNA_11 | CUGGUCAGGCCAGUCUUCUGUUUUAGAGCUAUGCU   |                                                                                |
|                            | CRISPR_crRNA_12 | UUAGUGUAGAAGCCACCCUAGUUUUAGAGCUAUGCU  |                                                                                |
| chr6:152360377-152360720   |                 |                                       |                                                                                |
|                            | CRISPR_crRNA_13 | UCUUAGUACAAGUGUAUACGUUUUAGAGCUAUGCU   | crRNAs targeting the enhancer chr6:152360377-152360720                         |
|                            | CRISPR_crRNA_14 | AAGGUAAAGGAAGAACAUGUGUUUUAGAGCUAUGCU  |                                                                                |
|                            | CRISPR_crRNA_15 | GCUAAGAAAGGAGUUAGUGUUUUAGAGCUAUGCU    |                                                                                |
|                            | CRISPR_crRNA_16 | AUUCACCCGUUCUAUCAUUCGUUUUUAGAGCUAUGCU |                                                                                |
| 3C                         |                 |                                       |                                                                                |
|                            | 3C_001          | CATGAAGGTTTGCTGTGTTCAA                | Anchor promoter chr6:152124717-152125407                                       |
|                            | 3C_002          | TTTGGTTGTCATTCAGCA                    | Test region 1: Enhancers chr6:151923646-151923936 and chr6:151924219-151925969 |
|                            | 3C_003          | GGAAAGCCAAACGACACAAT                  | Test region 2: Enhancer chr6:151936846-151939138                               |
|                            | 3C_004          | TTCCATGGCATCTTGTGTGT                  | NC region 1                                                                    |
|                            | 3C_005          | CAAGAGTGCCTCCTGCTATG                  | Test region 3: Enhancer chr6:151953109-151955347                               |
|                            | 3C_006          | ACCGGAACCTTGGAGAGGTA                  | NC region 2                                                                    |
|                            | 3C_007          | GCATAATTTCCCGAAAGCA                   | NC region 3                                                                    |
|                            | 3C_008          | CCACATGAAATTTGGGTTTTT                 | Test region 4: Enhancer chr6:151978585-151979706                               |
|                            | 3C_009          | GGACACAAGAAACATCTGTGA                 | NC region 4                                                                    |
|                            | 3C_010          | GGGTAGGGTTCCTGGGATAA                  | Test region 5: Enhancer chr6:152023958-152025191                               |
|                            | 3C_011          | CCCACAGAACTTCCCTGAAA                  | NC region 5                                                                    |
|                            | 3C_012          | CCCTGAACAAGGCATCGTAT                  | NC region 6                                                                    |
|                            | 3C_013          | CAATCCTGCGTGTGCTATGT                  | NC region 7                                                                    |
|                            | 3C_014          | TGGGGCTACAITTAAGTGCTTT                | NC region 8                                                                    |
|                            | 3C_015          | ACCTGATGGAGCTGACAACC                  | NC region 9                                                                    |
|                            | 3C_016          | CCCCCTCTCCCTCAITTA                    | Test region 6: Enhancer chr6:152360377-152360720                               |
|                            | 3C_017          | TTTTGGGATGCACTTAGATGG                 | Control template generation                                                    |
|                            | 3C_018          | TTGGCATTTCATATCATCCA                  |                                                                                |
|                            | 3C_019          | TTTTGGGATGCACTTAGATGG                 |                                                                                |
|                            | 3C_020          | AGGCATCAAGGTCTCAATCA                  |                                                                                |
|                            | 3C_021          | CACCGACCTAGTCTCCCTGA                  |                                                                                |
|                            | 3C_022          | GAAAACGGCAGTTCCAAAA                   |                                                                                |
|                            | 3C_023          | CAAACACACCTGGTGCATA                   |                                                                                |
|                            | 3C_024          | TGGGTGAGGTTTCTTTGCAT                  |                                                                                |
|                            | 3C_025          | TGGTAAAGCTCTGAGGGAAAA                 |                                                                                |
|                            | 3C_026          | TCCAGGAGCTAATCAAAAACC                 |                                                                                |
|                            | 3C_027          | AGTGCCAATTGCTGATGAGA                  |                                                                                |
|                            | 3C_028          | TTTGAGGGTTGCCTTGGTTA                  |                                                                                |
|                            | 3C_029          | TAACATCCCAGCCCTACCAG                  |                                                                                |
|                            | 3C_030          | ATTAGATAGGCGGGCAGA                    |                                                                                |
|                            | 3C_031          | TCAGTCTGGCATGGTAGGAA                  |                                                                                |
|                            | 3C_032          | TTACATATGGGTGGCAAAG                   |                                                                                |
|                            | 3C_033          | TGGAGAATTTGGAGCACTGA                  |                                                                                |
|                            | 3C_034          | GCCCCAGGTTCAAGAAGAAG                  |                                                                                |
|                            | 3C_035          | TCATTTCCCTGGAACAGGAC                  |                                                                                |
|                            | 3C_036          | GCCTGGCACATAGTTTACAAATC               |                                                                                |

|        |                           |
|--------|---------------------------|
| 3C_037 | GAGCCACTGAAGCTACACAGC     |
| 3C_038 | AGGAGGGGACCATCTCATT       |
| 3C_039 | GTCACCGTGGCAGCTTTTAT      |
| 3C_040 | ACGCCCTAAAACCTTGTC        |
| 3C_041 | GCAAGACCTGGCAAATTCAC      |
| 3C_042 | CCTTTTGTGCCTCTTGCTC       |
| 3C_043 | TTGTCCTCAATGACTGGCTTA     |
| 3C_044 | TGTGCAGACAGATGAATGG       |
| 3C_045 | GCCTGGATTGCAATGATGT       |
| 3C_046 | ACCTCAAGTTATCCGTTGC       |
| 3C_047 | TAACACATGTGCTCCCGAAG      |
| 3C_048 | TGAATGCCAAAAGATGCTG       |
| 3C_049 | AAAAAGCATAACAAAGGAACAAA   |
| 3C_050 | TTTCTCTGACTGCTTGAACC      |
| 3C_051 | GATGGGACTGTGCCACTGAT      |
| 3C_052 | TTTGTACGGCTGTCTGGTAG      |
| 3C_053 | CAGCTGAAACCCTAGGCAAG      |
| 3C_054 | AGAGAGGGCTTCTGGAAAGG      |
| 3C_055 | GGAACCTTCAATGTGACCAA      |
| 3C_056 | TTGGCTTCAGCTACATTTGC      |
| 3C_057 | ATCCAAACACCCAACAGAG       |
| 3C_058 | GCAATTGGAGTCACCGCTTA      |
| 3C_059 | CACATCCCGTTCAACTTTC       |
| 3C_060 | TCCATCCCTTCCCTATATTGC     |
| 3C_061 | GCAAGGAAGAAAAGAAGACACA    |
| 3C_062 | CTCCACCTTCATGGTGCAAA      |
| 3C_063 | GCATCACACTCAATGCATCA      |
| 3C_064 | TTGGAAAAGGCTTAACTTCAA     |
| 3C_065 | CAAGGCTTTATCTTGGGGITT     |
| 3C_066 | GTAATGCGAGCAATGGGAGT      |
| 3C_067 | CCCAACCCTGGTTAGGAACT      |
| 3C_068 | TGGTTCCTCACTAAGCCAATC     |
| 3C_069 | GGATCTGCCACTGTGTTCTT      |
| 3C_070 | AAAAACTAAGGAAAAATGGAATGAA |
| 3C_071 | GCTGCCTCACTGAACACAAA      |
| 3C_072 | CTTTCAGTGTTTCGGCCAGT      |
| 3C_073 | CCAGCAAGGCAAGGAATAA       |
| 3C_074 | GGCTCGATGTGAATCATGTG      |
| 3C_075 | ATTCTGAGAGCATGGGGGTA      |
| 3C_076 | CAGCACTGCATCAGGAAAAA      |
| 3C_077 | AAATCGATGCATAAAAACATCTCA  |
| 3C_078 | CATGAAATGCTTCCCCAGTT      |
| 3C_079 | GCGGTACCTCCTTCTCTCT       |
| 3C_080 | TTGTATTCGGCCATTCTTCC      |
| 3C_081 | TGCTCAACGGAGACTGCATA      |
| 3C_082 | CTGTGACAGAACCAGTAGCTT     |
| 3C_083 | CCTTTATCAGATGGGCTGGA      |
| 3C_084 | GGTGTA CTGCCTGCCTCTCT     |
| 3C_085 | ITGCCTCCCACTTTTCTCAC      |
| 3C_086 | TAITGGGGGTTGGAITTCA       |
| 3C_087 | GGAGGAGACCGGTTTCATTT      |
| 3C_088 | CGGGGTCTTCTACATTGCT       |
| 3C_089 | TTCGACAACGGAGCCATAAT      |
| 3C_090 | ATATTTCCTTGCCCTGCTT       |
| 3C_091 | CCAGGCCCGAATCTAATTT       |
| 3C_092 | TGCTGCAAACCTTTGTGCTTC     |
| 3C_093 | TTCTCCAAGTGTATCCCAAAGAA   |
| 3C_094 | GTGGAACATACCTGCCTGCT      |
| 3C_095 | CTCCCTAAGCCAGGCTCTTT      |
| 3C_096 | TGGACATGAAATAGAGGCAAG     |

|        |                         |
|--------|-------------------------|
| 3C_097 | CCACTTTTCACCCTTTTCCA    |
| 3C_098 | ACTGGTGAGCAAGGAGCCTA    |
| 3C_099 | TTGCACATTGATGGCAAAA     |
| 3C_100 | GCTGGAGGAGGAGATCCAAT    |
| 3C_101 | CCGTGCTGTAAATATAGCCTCA  |
| 3C_102 | CCTTGTGTTGAGGGAAGCTC    |
| 3C_103 | GGCAATCATGCCAGATACT     |
| 3C_104 | CGGTATCAGCTATCCACCATT   |
| 3C_105 | AGCCACCCAGTTTGTGGTAG    |
| 3C_106 | AATTGTGACATGTGGAGCCTA   |
| 3C_107 | GGTCCACAACTAAGCAGAGG    |
| 3C_108 | GTTGCTGTCTGGTCTCTCT     |
| 3C_109 | CTTGCCTTCAAATCCCTTG     |
| 3C_110 | TTGGTGACATCAACTCACC     |
| 3C_111 | GGGGATAGAGGGGAGGTCT     |
| 3C_112 | CCATCACTGATAACCTTTCTTCC |
| 3C_113 | GATAGGCACTGTGGTCTCAGC   |
| 3C_114 | GCTGCTGCTGGTAGAGTTCC    |
| 3C_115 | GGGTTGAATCTGGGGAGACT    |
| 3C_116 | CCATGGGCACTGTCAGTAAA    |
| 3C_117 | TGCACCATGACTAGCACACA    |
| 3C_118 | AGAAATTTCCAGGCAGGGATT   |
| 3C_119 | TTTTGGCCATTCTAACAGGTG   |
| 3C_120 | CCTCACACAGAAGACACACA    |
|        |                         |
